# Supplementary material for: Ab initio study of substituent effects in the interactions of dimethyl ether with aromatic rings
Source: Royal Society of Chemistry journal article supplement (doi:10.1039/b718722j), 2008-01-01
Supplement: b718722j_coord1.pdf [file b718722j_coord1.pdf]

(CH3)2O-C6F6 LP away eclipsed dimer MP2/aug-cc-pVDZ

R=4.5 Angstroms

Interaction Energy=-2.10 kcal/mol

|   |             |             |             |
|---|-------------|-------------|-------------|
| C | 0.00000000  | 1.38980100  | -0.87356400 |
| C | -1.20360300 | 0.69490100  | -0.87356400 |
| C | 1.20360300  | 0.69490100  | -0.87356400 |
| C | -1.20360300 | -0.69490100 | -0.87356400 |
| C | 1.20360300  | -0.69490100 | -0.87356400 |
| C | 0.00000000  | -1.38980100 | -0.87356400 |
| F | 0.00000000  | 2.71953700  | -0.87356400 |
| F | -2.35518800 | 1.35976900  | -0.87356400 |
| F | 2.35518800  | 1.35976900  | -0.87356400 |
| F | -2.35518800 | -1.35976900 | -0.87356400 |
| F | 2.35518800  | -1.35976900 | -0.87356400 |
| F | 0.00000000  | -2.71953700 | -0.87356400 |
| O | 0.00000000  | 0.00000000  | 3.62643600  |
| C | 0.00000000  | 1.16175600  | 2.82364700  |
| H | 0.00000000  | 2.01887900  | 3.49162000  |
| H | 0.88948800  | 1.19972200  | 2.18557000  |
| H | -0.88948800 | 1.19972200  | 2.18557000  |
| C | 0.00000000  | -1.16175600 | 2.82364700  |
| H | 0.00000000  | -2.01887900 | 3.49162000  |
| H | -0.88948800 | -1.19972200 | 2.18557000  |
| H | 0.88948800  | -1.19972200 | 2.18557000  |

(CH3)2O-C6F6 LP away staggered dimer MP2/aug-cc-pVDZ

R=4.5 Angstroms

Interaction Energy=-2.08 kcal/mol

|   |             |             |             |
|---|-------------|-------------|-------------|
| C | 0.00000000  | 1.38980100  | -0.87356400 |
| C | -1.20360300 | 0.69490000  | -0.87356400 |
| C | 1.20360300  | 0.69490000  | -0.87356400 |
| C | -1.20360300 | -0.69490000 | -0.87356400 |
| C | 1.20360300  | -0.69490000 | -0.87356400 |
| C | 0.00000000  | -1.38980100 | -0.87356400 |
| F | 0.00000000  | 2.71953700  | -0.87356400 |
| F | -2.35518800 | 1.35976800  | -0.87356400 |
| F | 2.35518800  | 1.35976800  | -0.87356400 |
| F | -2.35518800 | -1.35976800 | -0.87356400 |
| F | 2.35518800  | -1.35976800 | -0.87356400 |
| F | 0.00000000  | -2.71953700 | -0.87356400 |
| O | 0.00000000  | 0.00000000  | 3.62643600  |
| C | -1.16175600 | 0.00000000  | 2.82364700  |
| H | -2.01887900 | 0.00000000  | 3.49162000  |
| H | -1.19972200 | 0.88948800  | 2.18557000  |
| H | -1.19972200 | -0.88948800 | 2.18557000  |
| C | 1.16175600  | 0.00000000  | 2.82364700  |
| H | 2.01887900  | 0.00000000  | 3.49162000  |
| H | 1.19972200  | -0.88948800 | 2.18557000  |
| H | 1.19972200  | 0.88948800  | 2.18557000  |

(CH3)2O-C6H5NO2 LP away eclipsed dimer MP2/aug-cc-pVDZ

R=4.6 Angstroms

Interaction Energy=-2.25 kcal/mol

|   |             |             |            |
|---|-------------|-------------|------------|
| C | -1.15481600 | -2.18413200 | 0.00000000 |
|---|-------------|-------------|------------|

|   |             |             |             |
|---|-------------|-------------|-------------|
| C | -1.15481600 | -1.48761400 | -1.20800400 |
| C | -1.15481600 | -1.48761400 | 1.20800400  |
| C | -1.15481600 | -0.09543300 | -1.21907200 |
| C | -1.15481600 | -0.09543300 | 1.21907200  |
| C | -1.15481600 | 0.57008000  | 0.00000000  |
| H | -1.15481600 | -3.26576400 | 0.00000000  |
| H | -1.15481600 | -2.02763200 | -2.14510600 |
| H | -1.15481600 | -2.02763200 | 2.14510600  |
| H | -1.15481600 | 0.47098200  | -2.13807800 |
| H | -1.15481600 | 0.47098200  | 2.13807800  |
| N | -1.15481600 | 2.04105400  | 0.00000000  |
| O | -1.15481600 | 2.60970200  | -1.09054600 |
| O | -1.15481600 | 2.60970200  | 1.09054600  |
| O | 3.44518400  | -0.80702700 | 0.00000000  |
| C | 2.64239500  | -1.96878300 | 0.00000000  |
| H | 3.31036800  | -2.82590600 | 0.00000000  |
| H | 2.00431800  | -2.00674900 | 0.88948800  |
| H | 2.00431800  | -2.00674900 | -0.88948800 |
| C | 2.64239500  | 0.35472900  | 0.00000000  |
| H | 3.31036800  | 1.21185200  | 0.00000000  |
| H | 2.00431800  | 0.39269500  | -0.88948800 |
| H | 2.00431800  | 0.39269500  | 0.88948800  |

(CH3)2O-C6H5NO2 LP away staggered dimer MP2/aug-cc-pVDZ

R=4.6 Angstroms

Interaction Energy=-2.12 kcal/mol

|   |             |             |             |
|---|-------------|-------------|-------------|
| C | 1.15481600  | -2.18413200 | 0.00000000  |
| C | 1.15481600  | -1.48761400 | 1.20800400  |
| C | 1.15481600  | -1.48761400 | -1.20800400 |
| C | 1.15481600  | -0.09543300 | 1.21907200  |
| C | 1.15481600  | -0.09543300 | -1.21907200 |
| C | 1.15481600  | 0.57008000  | 0.00000000  |
| H | 1.15481600  | -3.26576400 | 0.00000000  |
| H | 1.15481600  | -2.02763200 | 2.14510600  |
| H | 1.15481600  | -2.02763200 | -2.14510600 |
| H | 1.15481600  | 0.47098200  | 2.13807800  |
| H | 1.15481600  | 0.47098200  | -2.13807800 |
| N | 1.15481600  | 2.04105400  | 0.00000000  |
| O | 1.15481600  | 2.60970200  | 1.09054600  |
| O | 1.15481600  | 2.60970200  | -1.09054600 |
| O | -3.44518400 | -0.80702700 | 0.00000000  |
| C | -2.64239500 | -0.80702700 | 1.16175600  |
| H | -3.31036800 | -0.80702700 | 2.01887900  |
| H | -2.00431800 | -1.69651400 | 1.19972200  |
| H | -2.00431800 | 0.08246100  | 1.19972200  |
| C | -2.64239500 | -0.80702700 | -1.16175600 |
| H | -3.31036800 | -0.80702700 | -2.01887900 |
| H | -2.00431800 | 0.08246100  | -1.19972200 |
| H | -2.00431800 | -1.69651400 | -1.19972200 |

(CH3)2O-C6H5CN LP away eclipsed dimer MP2/aug-cc-pVDZ

R=4.6 Angstroms

Interaction Energy=-2.25 kcal/mol

|   |            |            |            |
|---|------------|------------|------------|
| C | 0.23303200 | 2.30829900 | 0.00000000 |
|---|------------|------------|------------|

|   |             |             |             |
|---|-------------|-------------|-------------|
| C | 0.56317100  | 1.69489800  | -1.20782300 |
| C | 0.56317100  | 1.69489700  | 1.20782300  |
| C | 1.22237200  | 0.47009700  | -1.21508800 |
| C | 1.22237200  | 0.47009700  | 1.21508800  |
| C | 1.55160800  | -0.14162800 | 0.00000000  |
| H | -0.27965100 | 3.26086700  | 0.00000000  |
| H | 0.30734800  | 2.17022000  | -2.14516100 |
| H | 0.30734700  | 2.17021900  | 2.14516100  |
| H | 1.48351600  | -0.01511100 | -2.14577500 |
| H | 1.48351600  | -0.01511200 | 2.14577500  |
| C | 2.22997200  | -1.40203200 | 0.00000000  |
| N | 2.78619800  | -2.43550700 | 0.00000000  |
| O | -3.15827100 | -1.09673600 | 0.00000000  |
| C | -3.00195400 | 0.30672900  | 0.00000000  |
| H | -3.99636100 | 0.74490800  | 0.00000000  |
| H | -2.45808000 | 0.64256300  | 0.88948800  |
| H | -2.45808000 | 0.64256300  | -0.88948800 |
| C | -1.90077500 | -1.73927100 | 0.00000000  |
| H | -2.08275200 | -2.81059300 | 0.00000000  |
| H | -1.32091500 | -1.47030000 | -0.88948800 |
| H | -1.32091500 | -1.47030000 | 0.88948800  |

(CH<sub>3</sub>)<sub>2</sub>O-C<sub>6</sub>H<sub>5</sub>CN LP away staggered dimer MP2/aug-cc-pVDZ

R=4.6 Angstroms

Interaction Energy=-2.09 kcal/mol

|   |             |             |             |
|---|-------------|-------------|-------------|
| C | -0.40726900 | 2.28400500  | 0.00000000  |
| C | -0.68998000 | 1.64735200  | 1.20782300  |
| C | -0.68997900 | 1.64735200  | -1.20782300 |
| C | -1.25447800 | 0.37612200  | 1.21508800  |
| C | -1.25447800 | 0.37612200  | -1.21508800 |
| C | -1.53641600 | -0.25879100 | 0.00000000  |
| H | 0.03176100  | 3.27268300  | 0.00000000  |
| H | -0.47090900 | 2.14069100  | 2.14516100  |
| H | -0.47090800 | 2.14069100  | -2.14516100 |
| H | -1.47810600 | -0.12747900 | 2.14577500  |
| H | -1.47810600 | -0.12747900 | -2.14577500 |
| C | -2.11732400 | -1.56697400 | 0.00000000  |
| N | -2.59364200 | -2.63962400 | 0.00000000  |
| O | 3.23229400  | -0.85427100 | 0.00000000  |
| C | 2.49859100  | -0.52846500 | 1.16175600  |
| H | 3.10908000  | -0.79955700 | 2.01887900  |
| H | 2.27641700  | 0.54343500  | 1.19972200  |
| H | 1.55443300  | -1.08244700 | 1.19972200  |
| C | 2.49859100  | -0.52846400 | -1.16175600 |
| H | 3.10908100  | -0.79955600 | -2.01887900 |
| H | 1.55443300  | -1.08244600 | -1.19972200 |
| H | 2.27641800  | 0.54343600  | -1.19972200 |

(CH<sub>3</sub>)<sub>2</sub>O-C<sub>6</sub>H<sub>5</sub>CF<sub>3</sub> LP away eclipsed F towards dimer MP2/aug-cc-pVDZ

R=4.6 Angstroms

Interaction Energy=-2.44 kcal/mol

|   |             |            |             |
|---|-------------|------------|-------------|
| C | -0.94330100 | 2.50092900 | 0.00118600  |
| C | -0.45868700 | 2.00046500 | -1.20611000 |
| C | -0.45868700 | 2.00046500 | 1.20848200  |

|   |             |             |             |
|---|-------------|-------------|-------------|
| C | 0.50974400  | 1.00025500  | -1.21046300 |
| C | 0.50974400  | 1.00025500  | 1.21283500  |
| C | 0.99014300  | 0.50675400  | 0.00118600  |
| H | -1.69380100 | 3.28012600  | 0.00118600  |
| H | -0.83170300 | 2.39053000  | -2.14360200 |
| H | -0.83170300 | 2.39053000  | 2.14597400  |
| H | 0.89459800  | 0.61049200  | -2.14270300 |
| H | 0.89459800  | 0.61049200  | 2.14507500  |
| C | 1.99451900  | -0.60436500 | 0.00118600  |
| F | 1.39595800  | -1.81223200 | 0.00118600  |
| F | 2.79004700  | -0.56595600 | -1.08106800 |
| F | 2.79004700  | -0.56595600 | 1.08344000  |
| O | -3.28202300 | -1.69658100 | -0.00406300 |
| C | -3.51339600 | -0.30352200 | -0.00315000 |
| H | -4.58950200 | -0.15238400 | -0.00391700 |
| H | -3.08212600 | 0.16689700  | 0.88706500  |
| H | -3.08066100 | 0.16830500  | -0.89190900 |
| C | -1.89715700 | -1.97279700 | -0.00314100 |
| H | -1.78083100 | -3.05322100 | -0.00390000 |
| H | -1.41160400 | -1.55552200 | -0.89189900 |
| H | -1.41306900 | -1.55693000 | 0.88707500  |

(CH<sub>3</sub>)<sub>2</sub>O-C<sub>6</sub>H<sub>5</sub>CF<sub>3</sub> LP away staggered F towards dimer MP2/aug-cc-pVDZ

R=4.6 Angstroms

Interaction Energy=-2.32 kcal/mol

|   |             |             |             |
|---|-------------|-------------|-------------|
| C | 0.78462200  | 2.55515800  | -0.00118600 |
| C | 0.33234400  | 2.02529000  | 1.20611000  |
| C | 0.33234400  | 2.02529000  | -1.20848200 |
| C | -0.57146300 | 0.96632200  | 1.21046300  |
| C | -0.57146300 | 0.96632200  | -1.21283500 |
| C | -1.01997100 | 0.44366900  | -0.00118600 |
| H | 1.48478400  | 3.37988200  | -0.00118600 |
| H | 0.68016600  | 2.43797800  | 2.14360200  |
| H | 0.68016600  | 2.43797800  | -2.14597400 |
| H | -0.93111900 | 0.55319400  | 2.14270300  |
| H | -0.93111900 | 0.55319400  | -2.14507500 |
| C | -1.95269700 | -0.72824400 | -0.00118600 |
| F | -1.27957300 | -1.89620000 | -0.00118600 |
| F | -2.74906700 | -0.73979400 | 1.08106800  |
| F | -2.74906700 | -0.73979400 | -1.08344000 |
| O | 3.38194900  | -1.48744000 | 0.00406300  |
| C | 2.77031000  | -0.96542500 | 1.16490100  |
| H | 3.27764400  | -1.39842900 | 2.02278600  |
| H | 2.86237600  | 0.12540400  | 1.20214200  |
| H | 1.70749500  | -1.22774200 | 1.20213500  |
| C | 2.77233500  | -0.96714100 | -1.15861000 |
| H | 3.28116300  | -1.40141000 | -2.01496900 |
| H | 1.70958600  | -1.22951400 | -1.19730800 |
| H | 2.86446700  | 0.12363200  | -1.19730100 |

(CH<sub>3</sub>)<sub>2</sub>O-C<sub>6</sub>H<sub>5</sub>CF<sub>3</sub> LP away eclipsed F away dimer MP2/aug-cc-pVDZ

R=4.6 Angstroms

Interaction Energy=-2.37 kcal/mol

|   |             |            |            |
|---|-------------|------------|------------|
| C | -0.92828700 | 2.48770900 | 0.00118900 |
|---|-------------|------------|------------|

|   |             |             |             |
|---|-------------|-------------|-------------|
| C | -0.45340900 | 1.97799700  | 1.20848500  |
| C | -0.45340900 | 1.97799700  | -1.20610700 |
| C | 0.49567000  | 0.95940500  | 1.21283800  |
| C | 0.49567000  | 0.95940500  | -1.21046000 |
| C | 0.96381000  | 0.45426000  | 0.00118900  |
| H | -1.66785200 | 3.27729100  | 0.00118900  |
| H | -0.82377300 | 2.37058100  | 2.14597700  |
| H | -0.82377300 | 2.37058100  | -2.14359900 |
| H | 0.86512300  | 0.55501400  | 2.14507800  |
| H | 0.86512300  | 0.55501400  | -2.14270000 |
| C | 2.02180100  | -0.60593300 | 0.00118900  |
| F | 3.25885500  | -0.07028700 | 0.00118900  |
| F | 1.94252700  | -1.39843300 | 1.08344300  |
| F | 1.94252700  | -1.39843300 | -1.08106500 |
| O | -3.34704800 | -1.66419400 | -0.00407100 |
| C | -3.55167300 | -0.26695600 | -0.00314900 |
| H | -4.62468400 | -0.09521600 | -0.00390900 |
| H | -3.11145900 | 0.19510300  | 0.88706700  |
| H | -3.10997700 | 0.19649400  | -0.89190800 |
| C | -1.96773300 | -1.96690900 | -0.00315900 |
| H | -1.87214000 | -3.04936400 | -0.00392500 |
| H | -1.47427400 | -1.55901400 | -0.89191700 |
| H | -1.47575600 | -1.56040400 | 0.88705700  |

(CH<sub>3</sub>)<sub>2</sub>O-C<sub>6</sub>H<sub>5</sub>CF<sub>3</sub> LP away staggered F away dimer MP2/aug-cc-pVDZ

R=4.6 Angstroms

Interaction Energy=-2.24 kcal/mol

|   |             |             |             |
|---|-------------|-------------|-------------|
| C | 0.78363600  | 2.53699200  | -0.00118900 |
| C | 0.33886700  | 2.00080500  | -1.20848500 |
| C | 0.33886700  | 2.00080500  | 1.20610700  |
| C | -0.55004200 | 0.92930100  | -1.21283800 |
| C | -0.55004200 | 0.92930100  | 1.21046000  |
| C | -0.98834600 | 0.39806100  | -0.00118900 |
| H | 1.47655400  | 3.36781100  | -0.00118900 |
| H | 0.68603300  | 2.41404500  | -2.14597700 |
| H | 0.68603300  | 2.41404500  | 2.14359900  |
| H | -0.89561900 | 0.50432600  | -2.14507800 |
| H | -0.89561900 | 0.50432600  | 2.14270000  |
| C | -1.98359500 | -0.72124000 | -0.00118900 |
| F | -3.24941400 | -0.25764600 | -0.00118900 |
| F | -1.85886100 | -1.50786700 | -1.08344300 |
| F | -1.85886100 | -1.50786700 | 1.08106500  |
| O | 3.43724300  | -1.46888900 | 0.00407100  |
| C | 2.81836900  | -0.95547100 | 1.16490900  |
| H | 3.33171400  | -1.38133200 | 2.02279500  |
| H | 2.89517200  | 0.13653900  | 1.20214300  |
| H | 1.75932700  | -1.23262500 | 1.20215000  |
| C | 2.82040600  | -0.95717300 | -1.15860100 |
| H | 3.33525300  | -1.38428900 | -2.01496100 |
| H | 1.76143000  | -1.23438200 | -1.19729200 |
| H | 2.89727500  | 0.13478200  | -1.19730000 |

(CH<sub>3</sub>)<sub>2</sub>O-C<sub>6</sub>H<sub>5</sub>Br LP away eclipsed dimer MP2/aug-cc-pVDZ

R=4.6 Angstroms

Interaction Energy=-2.63 kcal/mol

|    |             |             |             |
|----|-------------|-------------|-------------|
| C  | -1.01895500 | 2.48796800  | 0.00000000  |
| C  | -1.01895500 | 1.78893800  | 1.20545100  |
| C  | -1.01895500 | 1.78893800  | -1.20545100 |
| C  | -1.01895500 | 0.39529300  | 1.21387200  |
| C  | -1.01895500 | 0.39529300  | -1.21387200 |
| C  | -1.01895500 | -0.28664400 | 0.00000000  |
| H  | -1.01895500 | 3.56939800  | 0.00000000  |
| H  | -1.01895500 | 2.32561700  | 2.14486500  |
| H  | -1.01895500 | 2.32561700  | -2.14486500 |
| H  | -1.01895500 | -0.15521400 | 2.14419000  |
| H  | -1.01895500 | -0.15521400 | -2.14419000 |
| Br | -1.01895500 | -2.16988900 | 0.00000000  |
| O  | 3.58104500  | 1.10066200  | 0.00000000  |
| C  | 2.77825600  | 2.26241900  | 0.00000000  |
| H  | 3.44622900  | 3.11954100  | 0.00000000  |
| H  | 2.14017900  | 2.30038500  | -0.88948800 |
| H  | 2.14017900  | 2.30038500  | 0.88948800  |
| C  | 2.77825600  | -0.06109400 | 0.00000000  |
| H  | 3.44622800  | -0.91821600 | 0.00000000  |
| H  | 2.14017900  | -0.09906000 | 0.88948800  |
| H  | 2.14017900  | -0.09906000 | -0.88948800 |

(CH3)2O-C6H5Br LP away staggered dimer MP2/aug-cc-pVDZ

R=4.6 Angstroms

Interaction Energy=-2.46 kcal/mol

|    |             |             |             |
|----|-------------|-------------|-------------|
| C  | -1.01895500 | -2.48796800 | 0.00000000  |
| C  | -1.01895500 | -1.78893800 | -1.20545100 |
| C  | -1.01895500 | -1.78893800 | 1.20545100  |
| C  | -1.01895500 | -0.39529300 | -1.21387200 |
| C  | -1.01895500 | -0.39529300 | 1.21387200  |
| C  | -1.01895500 | 0.28664400  | 0.00000000  |
| H  | -1.01895500 | -3.56939800 | 0.00000000  |
| H  | -1.01895500 | -2.32561700 | -2.14486500 |
| H  | -1.01895500 | -2.32561700 | 2.14486500  |
| H  | -1.01895500 | 0.15521400  | -2.14419000 |
| H  | -1.01895500 | 0.15521400  | 2.14419000  |
| Br | -1.01895500 | 2.16988900  | 0.00000000  |
| O  | 3.58104500  | -1.10066200 | 0.00000000  |
| C  | 2.77825600  | -1.10066300 | -1.16175600 |
| H  | 3.44622900  | -1.10066300 | -2.01887900 |
| H  | 2.14017900  | -1.99015000 | -1.19972200 |
| H  | 2.14017900  | -0.21117500 | -1.19972200 |
| C  | 2.77825600  | -1.10066300 | 1.16175600  |
| H  | 3.44622900  | -1.10066300 | 2.01887900  |
| H  | 2.14017900  | -0.21117500 | 1.19972200  |
| H  | 2.14017900  | -1.99015000 | 1.19972200  |

(CH3)2O-C6H5Cl LP away eclipsed dimer MP2/aug-cc-pVDZ

R=4.6 Angstroms

Interaction Energy=-2.54 kcal/mol

|   |            |             |             |
|---|------------|-------------|-------------|
| C | 1.23730300 | -1.99305400 | 0.00000000  |
| C | 1.23730200 | -1.29370800 | 1.20573600  |
| C | 1.23730200 | -1.29370800 | -1.20573600 |

|    |             |             |             |
|----|-------------|-------------|-------------|
| C  | 1.23730200  | 0.09977300  | 1.21389000  |
| C  | 1.23730200  | 0.09977300  | -1.21389000 |
| C  | 1.23730300  | 0.78056400  | 0.00000000  |
| H  | 1.23730300  | -3.07449200 | 0.00000000  |
| H  | 1.23730100  | -1.83014500 | 2.14538700  |
| H  | 1.23730100  | -1.83014500 | -2.14538700 |
| H  | 1.23730100  | 0.65454700  | 2.14171100  |
| H  | 1.23730100  | 0.65454700  | -2.14171100 |
| Cl | 1.23730300  | 2.51707000  | 0.00000000  |
| O  | -3.36269700 | -0.60624400 | 0.00000000  |
| C  | -2.55990800 | -1.76800000 | 0.00000000  |
| H  | -3.22788100 | -2.62512300 | 0.00000000  |
| H  | -1.92183000 | -1.80596400 | -0.88948900 |
| H  | -1.92183000 | -1.80596400 | 0.88948900  |
| C  | -2.55990800 | 0.55551200  | 0.00000000  |
| H  | -3.22788100 | 1.41263500  | 0.00000000  |
| H  | -1.92183200 | 0.59347700  | 0.88949000  |
| H  | -1.92183200 | 0.59347700  | -0.88949000 |

(CH<sub>3</sub>)<sub>2</sub>O-C<sub>6</sub>H<sub>5</sub>Cl LP away staggered dimer MP2/aug-cc-pVDZ

R=4.6 Angstroms

Interaction Energy=-2.39 kcal/mol

|    |             |             |             |
|----|-------------|-------------|-------------|
| C  | -1.23730300 | -1.99305400 | 0.00000000  |
| C  | -1.23730200 | -1.29370900 | -1.20573500 |
| C  | -1.23730200 | -1.29370900 | 1.20573500  |
| C  | -1.23730200 | 0.09977200  | -1.21389000 |
| C  | -1.23730200 | 0.09977200  | 1.21389000  |
| C  | -1.23730300 | 0.78056400  | 0.00000000  |
| H  | -1.23730300 | -3.07449200 | 0.00000000  |
| H  | -1.23730100 | -1.83014700 | -2.14538500 |
| H  | -1.23730100 | -1.83014700 | 2.14538500  |
| H  | -1.23730100 | 0.65454500  | -2.14171100 |
| H  | -1.23730100 | 0.65454500  | 2.14171100  |
| Cl | -1.23730300 | 2.51707000  | 0.00000000  |
| O  | 3.36269700  | -0.60624400 | 0.00000000  |
| C  | 2.55990900  | -0.60624600 | -1.16175600 |
| H  | 3.22788200  | -0.60624800 | -2.01887800 |
| H  | 1.92183200  | -1.49573400 | -1.19972000 |
| H  | 1.92183200  | 0.28324200  | -1.19972400 |
| C  | 2.55990900  | -0.60624600 | 1.16175600  |
| H  | 3.22788200  | -0.60624800 | 2.01887800  |
| H  | 1.92183200  | 0.28324200  | 1.19972400  |
| H  | 1.92183200  | -1.49573400 | 1.19972000  |

(CH<sub>3</sub>)<sub>2</sub>O-C<sub>6</sub>H<sub>5</sub>F LP away eclipsed dimer MP2/aug-cc-pVDZ

R=4.6 Angstroms

Interaction Energy=-2.24 kcal/mol

|   |            |             |             |
|---|------------|-------------|-------------|
| C | 0.99899500 | -1.91902900 | 0.00000000  |
| C | 1.14062100 | -1.23545600 | 1.20660000  |
| C | 1.14062100 | -1.23545600 | -1.20659900 |
| C | 1.42337900 | 0.12931000  | 1.21548100  |
| C | 1.42337900 | 0.12930900  | -1.21548100 |
| C | 1.55854600 | 0.78170900  | 0.00000000  |
| H | 0.77963000 | -2.97782300 | 0.00000000  |

|   |             |             |             |
|---|-------------|-------------|-------------|
| H | 1.03153400  | -1.76197300 | 2.14526100  |
| H | 1.03153500  | -1.76197400 | -2.14526100 |
| H | 1.53834700  | 0.68422000  | 2.13586400  |
| H | 1.53834800  | 0.68421900  | -2.13586400 |
| F | 1.83238000  | 2.10340100  | 0.00000000  |
| O | -3.22557000 | 0.36456800  | 0.00000000  |
| C | -2.67516800 | -0.93589500 | 0.00000000  |
| H | -3.50313900 | -1.63967800 | 0.00000000  |
| H | -2.05806200 | -1.10252200 | -0.88948800 |
| H | -2.05806300 | -1.10252200 | 0.88948800  |
| C | -2.20378300 | 1.33929800  | 0.00000000  |
| H | -2.68397600 | 2.31411200  | 0.00000000  |
| H | -1.57127300 | 1.24702400  | 0.88948800  |
| H | -1.57127300 | 1.24702500  | -0.88948700 |

(CH3)2O-C6H5F LP away staggered dimer MP2/aug-cc-pVDZ

R=4.6 Angstroms

Interaction Energy=-2.14 kcal/mol

|   |             |             |             |
|---|-------------|-------------|-------------|
| C | 1.05543900  | 1.88857500  | 0.00000000  |
| C | 1.17674000  | 1.20110400  | -1.20659900 |
| C | 1.17674000  | 1.20110300  | 1.20660000  |
| C | 1.41892000  | -0.17144300 | -1.21548200 |
| C | 1.41892100  | -0.17144400 | 1.21548100  |
| C | 1.53469000  | -0.82756200 | 0.00000000  |
| H | 0.86755300  | 2.95340600  | 0.00000100  |
| H | 1.08330800  | 1.73062500  | -2.14526000 |
| H | 1.08330900  | 1.73062300  | 2.14526200  |
| H | 1.51739000  | -0.72951700 | -2.13586500 |
| H | 1.51739100  | -0.72951800 | 2.13586400  |
| F | 1.76922700  | -2.15679000 | -0.00000100 |
| O | -3.23495900 | -0.26879800 | 0.00000000  |
| C | -2.44438200 | -0.12930300 | -1.16175600 |
| H | -3.10219400 | -0.24537100 | -2.01887900 |
| H | -1.97057100 | 0.85752700  | -1.19972100 |
| H | -1.66145300 | -0.89438600 | -1.19972300 |
| C | -2.44438200 | -0.12930500 | 1.16175600  |
| H | -3.10219300 | -0.24537400 | 2.01887900  |
| H | -1.66145300 | -0.89438800 | 1.19972100  |
| H | -1.97057100 | 0.85752500  | 1.19972300  |

(CH3)2O-C6H6 LP away eclipsed dimer MP2/aug-cc-pVDZ

R=4.6 Angstroms

Interaction Energy=-2.27 kcal/mol

|   |             |             |             |
|---|-------------|-------------|-------------|
| C | 0.00000000  | 1.39150000  | -1.52843300 |
| C | -1.20507400 | 0.69575000  | -1.52843300 |
| C | 1.20507400  | 0.69575000  | -1.52843300 |
| C | -1.20507400 | -0.69575000 | -1.52843300 |
| C | 1.20507400  | -0.69575000 | -1.52843300 |
| C | 0.00000000  | -1.39150000 | -1.52843300 |
| H | 0.00000000  | 2.47150000  | -1.52843300 |
| H | -2.14038200 | 1.23575000  | -1.52843300 |
| H | 2.14038200  | 1.23575000  | -1.52843300 |
| H | -2.14038200 | -1.23575000 | -1.52843300 |
| H | 2.14038200  | -1.23575000 | -1.52843300 |



|   |             |             |             |
|---|-------------|-------------|-------------|
| H | 0.00000000  | -2.47150000 | -1.52843300 |
| O | 0.00000000  | 0.00000000  | 3.07156700  |
| C | 0.00000000  | 1.16175600  | 2.26877800  |
| H | 0.00000000  | 2.01887900  | 2.93675100  |
| H | 0.88948800  | 1.19972200  | 1.63070100  |
| H | -0.88948800 | 1.19972200  | 1.63070100  |
| C | 0.00000000  | -1.16175600 | 2.26877800  |
| H | 0.00000000  | -2.01887900 | 2.93675100  |
| H | -0.88948800 | -1.19972200 | 1.63070100  |
| H | 0.88948800  | -1.19972200 | 1.63070100  |

(CH<sub>3</sub>)<sub>2</sub>O-C<sub>6</sub>H<sub>6</sub> LP away staggered dimer MP2/aug-cc-pVDZ

R=4.6 Angstroms

Interaction Energy=-2.27 kcal/mol

|   |             |             |             |
|---|-------------|-------------|-------------|
| C | 0.00000000  | 1.39150000  | -1.52843300 |
| C | -1.20507400 | 0.69575000  | -1.52843300 |
| C | 1.20507400  | 0.69575000  | -1.52843300 |
| C | -1.20507400 | -0.69575000 | -1.52843300 |
| C | 1.20507400  | -0.69575000 | -1.52843300 |
| C | 0.00000000  | -1.39150000 | -1.52843300 |
| H | 0.00000000  | 2.47150000  | -1.52843300 |
| H | -2.14038200 | 1.23575000  | -1.52843300 |
| H | 2.14038200  | 1.23575000  | -1.52843300 |
| H | -2.14038200 | -1.23575000 | -1.52843300 |
| H | 2.14038200  | -1.23575000 | -1.52843300 |
| H | 0.00000000  | -2.47150000 | -1.52843300 |
| O | 0.00000000  | 0.00000000  | 3.07156700  |
| C | -1.16175600 | 0.00000000  | 2.26877800  |
| H | -2.01887900 | 0.00000000  | 2.93675100  |
| H | -1.19972200 | 0.88948800  | 1.63070100  |
| H | -1.19972200 | -0.88948800 | 1.63070100  |
| C | 1.16175600  | 0.00000000  | 2.26877800  |
| H | 2.01887900  | 0.00000000  | 2.93675100  |
| H | 1.19972200  | -0.88948800 | 1.63070100  |
| H | 1.19972200  | 0.88948800  | 1.63070100  |

(CH<sub>3</sub>)<sub>2</sub>O-C<sub>6</sub>H<sub>5</sub>CH<sub>3</sub> LP away eclipsed H towards dimer MP2/aug-cc-pVDZ

R=4.6 Angstroms

Interaction Energy=-2.67 kcal/mol

|   |             |             |             |
|---|-------------|-------------|-------------|
| C | -0.92668100 | -2.00463200 | 0.00083500  |
| C | -1.09478300 | -1.32333000 | -1.20334700 |
| C | -1.08975900 | -1.32178900 | 1.20483600  |
| C | -1.42242400 | 0.03133800  | -1.19944400 |
| C | -1.41741700 | 0.03287400  | 1.20056600  |
| C | -1.58584000 | 0.72915200  | 0.00046100  |
| H | -0.67573300 | -3.05712900 | 0.00098500  |
| H | -0.97535100 | -1.84603100 | -2.14371500 |
| H | -0.96640400 | -1.84328600 | 2.14536500  |
| H | -1.55629800 | 0.55401600  | -2.13963300 |
| H | -1.54736900 | 0.55675500  | 2.14063600  |
| C | -1.90589000 | 2.19778900  | 0.00018900  |
| H | -0.99181900 | 2.79400600  | -0.00210000 |
| H | -2.48320800 | 2.47287100  | -0.88158300 |
| H | -2.47952500 | 2.47400100  | 0.88400800  |

|   |            |             |             |
|---|------------|-------------|-------------|
| O | 3.21384500 | 0.44344000  | -0.00136100 |
| C | 2.70667200 | -0.87448400 | -0.00085600 |
| H | 3.55742500 | -1.55055100 | -0.00103500 |
| H | 2.09575400 | -1.06118600 | 0.88891500  |
| H | 2.09505400 | -1.06159700 | -0.89006000 |
| C | 2.16043700 | 1.38390800  | -0.00116400 |
| H | 2.60818800 | 2.37404300  | -0.00156900 |
| H | 1.53096800 | 1.27059900  | -0.89037800 |
| H | 1.53166800 | 1.27101000  | 0.88859800  |

(CH3)2O-C6H5CH3 LP away staggered H towards dimer MP2/aug-cc-pVDZ

R=4.6 Angstroms

Interaction Energy=-2.56 kcal/mol

|   |             |             |             |
|---|-------------|-------------|-------------|
| C | -0.99970600 | -1.96923200 | 0.00141200  |
| C | -1.14272300 | -1.28253600 | -1.20294700 |
| C | -1.13752600 | -1.28053700 | 1.20523500  |
| C | -1.42037200 | 0.08325600  | -1.19939600 |
| C | -1.41519200 | 0.08524900  | 1.20061400  |
| C | -1.55798100 | 0.78692400  | 0.00032800  |
| H | -0.78759500 | -3.03023800 | 0.00183500  |
| H | -1.04262200 | -1.80952300 | -2.14317900 |
| H | -1.03336600 | -1.80596200 | 2.14590000  |
| H | -1.53499900 | 0.61024800  | -2.13972000 |
| H | -1.52576200 | 0.61380100  | 2.14054800  |
| C | -1.82385600 | 2.26632800  | -0.00032600 |
| H | -0.88849800 | 2.82855800  | -0.00281200 |
| H | -2.39072300 | 2.56219800  | -0.88214800 |
| H | -2.38691200 | 2.56366400  | 0.88344200  |
| O | 3.22796700  | 0.32506400  | -0.00160900 |
| C | 2.44074500  | 0.16456900  | -1.16293200 |
| H | 3.09494100  | 0.29722800  | -2.02041500 |
| H | 1.99264700  | -0.83422500 | -1.20021200 |
| H | 1.63823700  | 0.90909000  | -1.20089600 |
| C | 2.44179500  | 0.16569400  | 1.16058000  |
| H | 3.09676500  | 0.29918300  | 2.01734200  |
| H | 1.63932100  | 0.91025100  | 1.19854800  |
| H | 1.99373100  | -0.83306400 | 1.19923200  |

(CH3)2O-C6H5CH3 LP away eclipsed H away dimer MP2/aug-cc-pVDZ

R=4.6 Angstroms

Interaction Energy=-2.60 kcal/mol

|   |             |             |             |
|---|-------------|-------------|-------------|
| C | -0.89958400 | -2.01091500 | 0.00089000  |
| C | -1.06779400 | -1.32925800 | 1.20485700  |
| C | -1.07277200 | -1.33094900 | -1.20332600 |
| C | -1.40791500 | 0.02233000  | 1.20052400  |
| C | -1.41287600 | 0.02064400  | -1.19948600 |
| C | -1.58776800 | 0.71570800  | 0.00039800  |
| H | -0.63213500 | -3.05934000 | 0.00107400  |
| H | -0.93044400 | -1.84723800 | 2.14538900  |
| H | -0.93931000 | -1.85025000 | -2.14369000 |
| H | -1.53261600 | 0.54756900  | 2.14054700  |
| H | -1.54146300 | 0.54456300  | -2.13972200 |
| C | -1.98762400 | 2.16465200  | 0.00020700  |
| H | -3.07412100 | 2.26723400  | 0.00238100  |

|   |             |             |             |
|---|-------------|-------------|-------------|
| H | -1.60459900 | 2.67697600  | 0.88185500  |
| H | -1.60824900 | 2.67573600  | -0.88373500 |
| O | 3.21822600  | 0.47517600  | -0.00135800 |
| C | 2.72321000  | -0.84736200 | -0.00080400 |
| H | 3.58015200  | -1.51556700 | -0.00094400 |
| H | 2.11402500  | -1.03964300 | 0.88896800  |
| H | 2.11335100  | -1.04013500 | -0.89000800 |
| C | 2.15620400  | 1.40590600  | -0.00121300 |
| H | 2.59481900  | 2.40012100  | -0.00165400 |
| H | 1.52781600  | 1.28676800  | -0.89043000 |
| H | 1.52849000  | 1.28726000  | 0.88854600  |

(CH3)2O-C6H5CH3 LP away staggered H away dimer MP2/aug-cc-pVDZ

R=4.6 Angstroms

Interaction Energy=-2.52 kcal/mol

|   |             |             |             |
|---|-------------|-------------|-------------|
| C | -0.97400800 | -1.97594000 | 0.00161200  |
| C | -1.11660400 | -1.28806800 | 1.20535000  |
| C | -1.12175300 | -1.29039600 | -1.20283300 |
| C | -1.40604500 | 0.07527100  | 1.20056400  |
| C | -1.41117700 | 0.07295000  | -1.19944600 |
| C | -1.55995000 | 0.77446700  | 0.00020500  |
| H | -0.74587400 | -3.03361600 | 0.00214700  |
| H | -0.99863800 | -1.81049100 | 2.14605600  |
| H | -1.00780900 | -1.81463900 | -2.14302200 |
| H | -1.51101300 | 0.60512000  | 2.14041000  |
| H | -1.52016500 | 0.60098100  | -2.13985800 |
| C | -1.90545200 | 2.23732500  | -0.00047100 |
| H | -2.98736300 | 2.38038600  | 0.00170400  |
| H | -1.50353200 | 2.73529900  | 0.88098800  |
| H | -1.50730700 | 2.73359200  | -0.88460200 |
| O | 3.23371800  | 0.35473600  | -0.00162900 |
| C | 2.44792400  | 0.18732100  | -1.16294200 |
| H | 3.10096200  | 0.32551800  | -2.02043300 |
| H | 2.00845800  | -0.81530500 | -1.20011000 |
| H | 1.63902400  | 0.92488800  | -1.20100200 |
| C | 2.44893500  | 0.18872600  | 1.16057000  |
| H | 3.10271900  | 0.32796000  | 2.01732400  |
| H | 1.64006900  | 0.92633900  | 1.19844100  |
| H | 2.00950200  | -0.81385400 | 1.19933300  |

(CH3)2O-C6H5OCH3 LP away eclipsed O-LP towards dimer MP2/aug-cc-pVDZ

R=4.6 Angstroms

Interaction Energy=-2.61 kcal/mol

|   |             |             |             |
|---|-------------|-------------|-------------|
| C | -0.01964100 | 2.26999000  | 0.00130800  |
| C | -0.34729000 | 1.65199900  | 1.20756200  |
| C | -1.00815600 | 0.42499300  | 1.20998900  |
| C | -1.33745200 | -0.18180400 | -0.00034200 |
| C | -1.01189700 | 0.42863300  | -1.20985500 |
| C | -0.35102100 | 1.65562900  | -1.20578000 |
| H | 0.49580700  | 3.22097000  | 0.00194200  |
| H | -0.08442700 | 2.12150000  | 2.14646000  |
| H | -1.26069500 | -0.07696300 | 2.13510100  |
| H | -1.26729700 | -0.07053900 | -2.13568700 |
| H | -0.09105900 | 2.12795300  | -2.14407000 |

|   |             |             |             |
|---|-------------|-------------|-------------|
| O | -1.96336200 | -1.41100600 | -0.00122400 |
| C | -3.38354400 | -1.28174000 | 0.00116600  |
| H | -3.79024600 | -2.28909900 | 0.00028000  |
| H | -3.72185900 | -0.74762500 | 0.89212900  |
| H | -3.72461000 | -0.74494900 | -0.88713500 |
| O | 3.37326400  | -1.13371200 | -0.00111400 |
| C | 3.21616000  | 0.26966500  | -0.00014800 |
| H | 4.21032100  | 0.70840100  | 0.00012700  |
| H | 2.67207400  | 0.60580400  | -0.88939100 |
| H | 2.67212100  | 0.60458400  | 0.88958400  |
| C | 2.11612800  | -1.77695100 | -0.00152300 |
| H | 2.29870600  | -2.84817100 | -0.00226200 |
| H | 1.53614000  | -1.50891500 | 0.88816400  |
| H | 1.53609400  | -1.50769500 | -0.89081100 |

(CH<sub>3</sub>)<sub>2</sub>O-C<sub>6</sub>H<sub>5</sub>OCH<sub>3</sub> LP away staggered O-LP towards dimer MP2/aug-cc-pVDZ  
R=4.6 Angstroms

Interaction Energy=-2.49 kcal/mol

|   |             |             |             |
|---|-------------|-------------|-------------|
| C | -0.12333700 | 2.26672100  | 0.00266400  |
| C | -0.42242900 | 1.63368300  | 1.20853300  |
| C | -1.02654300 | 0.37776200  | 1.21019700  |
| C | -1.32774800 | -0.24272200 | -0.00051100 |
| C | -1.03040300 | 0.38267600  | -1.20964500 |
| C | -0.42627900 | 1.63858400  | -1.20480700 |
| H | 0.34812200  | 3.24025800  | 0.00388900  |
| H | -0.18130900 | 2.11414100  | 2.14772300  |
| H | -1.25590000 | -0.13576300 | 2.13499700  |
| H | -1.26271300 | -0.12709000 | -2.13578600 |
| H | -0.18815300 | 2.12285400  | -2.14280200 |
| O | -1.89684200 | -1.49923800 | -0.00215500 |
| C | -3.32144700 | -1.43499700 | 0.00024800  |
| H | -3.68169900 | -2.45988500 | -0.00125900 |
| H | -3.68382900 | -0.91743100 | 0.89151400  |
| H | -3.68666700 | -0.91381800 | -0.88774800 |
| O | 3.42154000  | -0.97840200 | -0.00163900 |
| C | 2.69783900  | -0.63252900 | 1.16059000  |
| H | 3.30007800  | -0.92265700 | 2.01731800  |
| H | 2.50746600  | 0.44542300  | 1.19994600  |
| H | 1.73771200  | -1.15839400 | 1.19792000  |
| C | 2.69774700  | -0.62954900 | -1.16292000 |
| H | 3.29991800  | -0.91747800 | -2.02043700 |
| H | 1.73761700  | -1.15531600 | -1.20152300 |
| H | 2.50737100  | 0.44850100  | -1.19949600 |

(CH<sub>3</sub>)<sub>2</sub>O-C<sub>6</sub>H<sub>5</sub>OCH<sub>3</sub> LP away eclipsed O-LP away dimer MP2/aug-cc-pVDZ  
R=4.9 Angstroms

Interaction Energy=-1.96 kcal/mol

|   |            |             |             |
|---|------------|-------------|-------------|
| C | 0.88554500 | -2.31378800 | 0.00011000  |
| C | 1.07746000 | -1.64151100 | -1.20634300 |
| C | 1.45130100 | -0.29892800 | -1.20916600 |
| C | 1.63451900 | 0.36706300  | 0.00097000  |
| C | 1.44633000 | -0.29831500 | 1.21067900  |
| C | 1.07250200 | -1.64090000 | 1.20700000  |
| H | 0.59814600 | -3.35659600 | -0.00021600 |

|   |             |             |             |
|---|-------------|-------------|-------------|
| H | 0.94152000  | -2.16240900 | -2.14508800 |
| H | 1.61698600  | 0.23771700  | -2.13443700 |
| H | 1.60821100  | 0.23879900  | 2.13635200  |
| H | 0.93270500  | -2.16132200 | 2.14544300  |
| O | 2.03508400  | 1.68700600  | 0.00145800  |
| C | 0.92162000  | 2.57797400  | -0.00105500 |
| H | 1.32649000  | 3.58607100  | -0.00047900 |
| H | 0.30748700  | 2.42711100  | -0.89191400 |
| H | 0.30383100  | 2.42756200  | 0.88735000  |
| O | -3.45924900 | 0.34511300  | -0.00103400 |
| C | -2.99866800 | -0.98980700 | -0.00113400 |
| H | -3.87263600 | -1.63558300 | -0.00161200 |
| H | -2.39399100 | -1.19787700 | -0.89042800 |
| H | -2.39468800 | -1.19825000 | 0.88854700  |
| C | -2.37346800 | 1.24801200  | -0.00041900 |
| H | -2.78617400 | 2.25325800  | -0.00037000 |
| H | -1.74905700 | 1.11270000  | 0.88928500  |
| H | -1.74836000 | 1.11307300  | -0.88969000 |

(CH<sub>3</sub>)<sub>2</sub>O-C<sub>6</sub>H<sub>5</sub>OCH<sub>3</sub> LP away staggered O-LP away dimer MP2/aug-cc-pVDZ

R=4.7 Angstroms

Interaction Energy=-2.39 kcal/mol

|   |             |             |             |
|---|-------------|-------------|-------------|
| C | -0.86734800 | -2.28181200 | 0.00013300  |
| C | -1.04718800 | -1.60601000 | 1.20647600  |
| C | -1.39667800 | -0.25688300 | 1.20908200  |
| C | -1.56769700 | 0.41215000  | -0.00116100 |
| C | -1.39145700 | -0.25668800 | -1.21076200 |
| C | -1.04198100 | -1.60581500 | -1.20686600 |
| H | -0.59886300 | -3.32965000 | 0.00062800  |
| H | -0.92078700 | -2.12915500 | 2.14530500  |
| H | -1.55271800 | 0.28279800  | 2.13426500  |
| H | -1.54350300 | 0.28314300  | -2.13652300 |
| H | -0.91153000 | -2.12880900 | -2.14522500 |
| O | -1.94431600 | 1.73912500  | -0.00186600 |
| C | -0.81491500 | 2.60980100  | 0.00064100  |
| H | -1.20148000 | 3.62505900  | -0.00011100 |
| H | -0.20369900 | 2.44797400  | 0.89158300  |
| H | -0.19986000 | 2.44811700  | -0.88768100 |
| O | 3.33127400  | 0.24772600  | 0.00128500  |
| C | 2.55487700  | 0.04532900  | -1.16077800 |
| H | 3.20177800  | 0.21309400  | -2.01764500 |
| H | 2.16114700  | -0.97610100 | -1.19857500 |
| H | 1.71354500  | 0.74564400  | -1.19940000 |
| C | 2.55374600  | 0.04614800  | 1.16273400  |
| H | 3.19981200  | 0.21451700  | 2.02011200  |
| H | 1.71237700  | 0.74649000  | 1.20004400  |
| H | 2.15997900  | -0.97525600 | 1.20086800  |

(CH<sub>3</sub>)<sub>2</sub>O-C<sub>6</sub>H<sub>5</sub>N(CH<sub>3</sub>)<sub>2</sub> LP away eclipsed N-LP towards dimer MP2/aug-cc-pVDZ

R=4.5 Angstroms

Interaction Energy=-3.14 kcal/mol

|   |             |            |             |
|---|-------------|------------|-------------|
| C | -0.79438400 | 2.38895200 | 0.01442500  |
| C | -0.29766600 | 1.88671000 | -1.18489800 |
| C | -0.32230000 | 1.85111100 | 1.20824900  |

|   |             |             |             |
|---|-------------|-------------|-------------|
| C | 0.64692200  | 0.86537700  | -1.19642700 |
| C | 0.62216400  | 0.82959700  | 1.20883400  |
| C | 1.11751200  | 0.29848000  | 0.00300800  |
| H | -1.52567900 | 3.18444100  | 0.01873100  |
| H | -0.63830800 | 2.29441800  | -2.12736200 |
| H | -0.68239000 | 2.23071200  | 2.15521200  |
| H | 1.01074800  | 0.51024600  | -2.14783800 |
| H | 0.96644200  | 0.44621700  | 2.15654800  |
| N | 2.02279600  | -0.75907500 | -0.00340500 |
| C | 2.77629200  | -0.97506600 | -1.22194800 |
| C | 2.75112100  | -1.01144200 | 1.22342300  |
| H | 3.36660200  | -0.09917400 | -1.51946100 |
| H | 3.45037100  | -1.81359600 | -1.06920700 |
| H | 2.11208000  | -1.23501900 | -2.04357600 |
| H | 3.33491600  | -0.14496700 | 1.55894000  |
| H | 2.07022000  | -1.29551300 | 2.02311300  |
| H | 3.42845700  | -1.84526500 | 1.05971600  |
| O | -3.13667700 | -1.70604700 | -0.01775300 |
| C | -3.33599400 | -0.30807200 | -0.00843300 |
| H | -4.40834400 | -0.13225200 | -0.00900500 |
| H | -2.89476800 | 0.14684700  | 0.88495400  |
| H | -2.89180400 | 0.15913000  | -0.89397700 |
| C | -1.75852200 | -2.01400500 | -0.01758300 |
| H | -1.66704100 | -3.09679100 | -0.02490800 |
| H | -1.26278000 | -1.60255200 | -0.90342700 |
| H | -1.26574400 | -1.61483500 | 0.87550400  |

(CH<sub>3</sub>)<sub>2</sub>O-C<sub>6</sub>H<sub>5</sub>N(CH<sub>3</sub>)<sub>2</sub> LP away staggered N-LP towards dimer MP2/aug-cc-pVDZ  
R=4.6 Angstroms

Interaction Energy=-2.92 kcal/mol

|   |             |             |             |
|---|-------------|-------------|-------------|
| C | -0.54255200 | 2.47041700  | 0.02309700  |
| C | -0.09584400 | 1.92753700  | -1.17818700 |
| C | -0.12310400 | 1.88632500  | 1.21484000  |
| C | 0.74797700  | 0.82154000  | -1.19368200 |
| C | 0.72057900  | 0.78011900  | 1.21146000  |
| C | 1.16319200  | 0.20864500  | 0.00357600  |
| H | -1.19538300 | 3.33144500  | 0.03048900  |
| H | -0.39667200 | 2.36880400  | -2.11908500 |
| H | -0.44545400 | 2.29505400  | 2.16327700  |
| H | 1.07635700  | 0.43683400  | -2.14648700 |
| H | 1.02732700  | 0.36270900  | 2.15768600  |
| N | 1.96446200  | -0.92971300 | -0.00690100 |
| C | 2.69384900  | -1.21183000 | -1.22659700 |
| C | 2.66599400  | -1.25394100 | 1.21865300  |
| H | 3.36422800  | -0.39465200 | -1.52152100 |
| H | 3.28569300  | -2.11083100 | -1.07705400 |
| H | 2.00782500  | -1.40505600 | -2.04870400 |
| H | 3.32916200  | -0.44766500 | 1.55672700  |
| H | 1.96150200  | -1.47508800 | 2.01778400  |
| H | 3.26144300  | -2.14749300 | 1.05176400  |
| O | -3.34093200 | -1.44537300 | -0.02219400 |
| C | -2.70025700 | -0.94679900 | -1.17766200 |
| H | -3.22960300 | -1.34322200 | -2.03992000 |
| H | -2.73230400 | 0.14774100  | -1.20463900 |

|   |             |             |             |
|---|-------------|-------------|-------------|
| H | -1.65339000 | -1.26666800 | -1.21671600 |
| C | -2.70501800 | -0.97026900 | 1.14572700  |
| H | -3.23787700 | -1.38400900 | 1.99762300  |
| H | -1.65830700 | -1.29090600 | 1.18260000  |
| H | -2.73722000 | 0.12350400  | 1.19467800  |

(CH3)2O-C6H5N(CH3)2 LP away eclipsed N-LP away dimer MP2/aug-cc-pVDZ  
R=4.6 Angstroms

Interaction Energy=-3.00 kcal/mol

|   |             |             |             |
|---|-------------|-------------|-------------|
| C | -0.73553200 | 2.47798100  | 0.00981300  |
| C | -0.25746300 | 1.94975300  | 1.20554600  |
| C | -0.22984700 | 1.98024400  | -1.18763900 |
| C | 0.70896300  | 0.94900100  | 1.21000600  |
| C | 0.73671800  | 0.97964600  | -1.19529300 |
| C | 1.24371900  | 0.45113500  | 0.00682900  |
| H | -1.48848600 | 3.25301200  | 0.01099900  |
| H | -0.64162000 | 2.30974400  | 2.15070800  |
| H | -0.59220100 | 2.36430800  | -2.13193500 |
| H | 1.04669200  | 0.56257300  | 2.15883800  |
| H | 1.09636300  | 0.61741500  | -2.14561600 |
| N | 2.24850700  | -0.51240300 | 0.00614700  |
| C | 2.42636500  | -1.28090800 | 1.22147400  |
| C | 2.45458400  | -1.24975200 | -1.22393500 |
| H | 1.51971500  | -1.82182900 | 1.52073400  |
| H | 3.22490900  | -2.00072400 | 1.06324500  |
| H | 2.72659100  | -0.63514200 | 2.04407800  |
| H | 1.55523800  | -1.78260800 | -1.55771500 |
| H | 2.77351900  | -0.58332800 | -2.02267600 |
| H | 3.24947600  | -1.97360000 | -1.06571200 |
| O | -3.06012700 | -1.73651100 | -0.01667300 |
| C | -3.28980200 | -0.34318200 | -0.01100600 |
| H | -4.36571800 | -0.19072000 | -0.01363700 |
| H | -2.85998000 | 0.12333100  | 0.88196200  |
| H | -2.85447400 | 0.13147400  | -0.89698700 |
| C | -1.67560600 | -2.01443200 | -0.01366000 |
| H | -1.56059700 | -3.09498700 | -0.01825000 |
| H | -1.18752700 | -1.59439100 | -0.89972800 |
| H | -1.19303300 | -1.60253400 | 0.87922000  |

(CH3)2O-C6H5N(CH3)2 LP away staggered N-LP away dimer MP2/aug-cc-pVDZ  
R=4.6 Angstroms

Interaction Energy=-2.76 kcal/mol

|   |             |             |             |
|---|-------------|-------------|-------------|
| C | -0.51699500 | 2.53259200  | 0.01374000  |
| C | -0.08710000 | 1.96281800  | 1.20868700  |
| C | -0.05619700 | 1.99464900  | -1.18444000 |
| C | 0.78852300  | 0.88171700  | 1.21167300  |
| C | 0.81958200  | 0.91371000  | -1.19356800 |
| C | 1.27827300  | 0.34112400  | 0.00777300  |
| H | -1.19961100 | 3.37023300  | 0.01606700  |
| H | -0.43874700 | 2.35336400  | 2.15437200  |
| H | -0.38344600 | 2.41032700  | -2.12816800 |
| H | 1.09103300  | 0.46582200  | 2.15992900  |
| H | 1.14661600  | 0.52307500  | -2.14442200 |
| N | 2.19535400  | -0.70623500 | 0.00568400  |

|   |             |             |             |
|---|-------------|-------------|-------------|
| C | 2.30525200  | -1.48926600 | 1.21978400  |
| C | 2.33682900  | -1.45674100 | -1.22556700 |
| H | 1.35485700  | -1.94967700 | 1.51800800  |
| H | 3.03814100  | -2.27561900 | 1.06051100  |
| H | 2.66030900  | -0.87342000 | 2.04349100  |
| H | 1.39460800  | -1.90873100 | -1.56036700 |
| H | 2.71282200  | -0.81932900 | -2.02316500 |
| H | 3.06563200  | -2.24730200 | -1.06839500 |
| O | -3.19969200 | -1.46345500 | -0.02001900 |
| C | -2.57150300 | -0.95129100 | -1.17639900 |
| H | -3.08728600 | -1.36667700 | -2.03795000 |
| H | -2.63545600 | 0.14172000  | -1.20815500 |
| H | -1.51566200 | -1.24059700 | -1.21207300 |
| C | -2.58030800 | -0.96500900 | 1.14705600  |
| H | -3.10258700 | -1.39051500 | 1.99970900  |
| H | -1.52475400 | -1.25476300 | 1.18731200  |
| H | -2.64454800 | 0.12755400  | 1.19123000  |
