# Supplementary material for: Ab initio study of substituent effects in the interactions of dimethyl ether with aromatic rings
Source: Royal Society of Chemistry journal article supplement (doi:10.1039/b718722j), 2008-01-01
Supplement: b718722j_coord2.pdf [file b718722j_coord2.pdf]

(CH3)2O-C6F6 LP towards eclipsed dimer MP2/aug-cc-pVDZ

R=3.0 Angstroms

Interaction Energy=-4.20 kcal/mol

|   |             |             |             |
|---|-------------|-------------|-------------|
| C | 0.00000000  | 1.38980100  | -0.80747000 |
| C | -1.20360300 | 0.69490100  | -0.80747000 |
| C | 1.20360300  | 0.69490000  | -0.80747000 |
| C | -1.20360300 | -0.69490000 | -0.80747000 |
| C | 1.20360300  | -0.69490000 | -0.80747000 |
| C | 0.00000000  | -1.38980100 | -0.80747000 |
| F | 0.00000000  | 2.71953700  | -0.80747000 |
| F | -2.35518800 | 1.35976900  | -0.80747000 |
| F | 2.35518800  | 1.35976900  | -0.80747000 |
| F | -2.35518800 | -1.35976800 | -0.80747000 |
| F | 2.35518800  | -1.35976900 | -0.80747000 |
| F | 0.00000000  | -2.71953700 | -0.80747000 |
| O | 0.00000000  | 0.00000000  | 2.19253000  |
| C | 0.00000000  | 1.16175600  | 2.99531900  |
| H | 0.00000000  | 2.01887900  | 2.32734600  |
| H | -0.88948800 | 1.19972200  | 3.63339600  |
| H | 0.88948800  | 1.19972200  | 3.63339600  |
| C | 0.00000000  | -1.16175600 | 2.99531900  |
| H | 0.00000000  | -2.01887900 | 2.32734600  |
| H | 0.88948800  | -1.19972200 | 3.63339600  |
| H | -0.88948800 | -1.19972200 | 3.63339600  |

(CH3)2O-C6F6 LP towards staggered dimer MP2/aug-cc-pVDZ

R=3.0 Angstroms

Interaction Energy=-4.19 kcal/mol

|   |             |             |             |
|---|-------------|-------------|-------------|
| C | 0.00000000  | 1.38980100  | -0.80747000 |
| C | -1.20360300 | 0.69490000  | -0.80747000 |
| C | 1.20360300  | 0.69490000  | -0.80747000 |
| C | -1.20360300 | -0.69490000 | -0.80747000 |
| C | 1.20360300  | -0.69490000 | -0.80747000 |
| C | 0.00000000  | -1.38980100 | -0.80747000 |
| F | 0.00000000  | 2.71953700  | -0.80747000 |
| F | -2.35518800 | 1.35976800  | -0.80747000 |
| F | 2.35518800  | 1.35976800  | -0.80747000 |
| F | -2.35518800 | -1.35976800 | -0.80747000 |
| F | 2.35518800  | -1.35976800 | -0.80747000 |
| F | 0.00000000  | -2.71953700 | -0.80747000 |
| O | 0.00000000  | 0.00000000  | 2.19253000  |
| C | -1.16175600 | 0.00000000  | 2.99531900  |
| H | -2.01887900 | 0.00000000  | 2.32734600  |
| H | -1.19972200 | -0.88948800 | 3.63339600  |
| H | -1.19972200 | 0.88948800  | 3.63339600  |
| C | 1.16175600  | 0.00000000  | 2.99531900  |
| H | 2.01887900  | 0.00000000  | 2.32734600  |
| H | 1.19972200  | 0.88948800  | 3.63339600  |
| H | 1.19972200  | -0.88948800 | 3.63339600  |

(CH3)2O-C6H5NO2 LP towards eclipsed dimer MP2/aug-cc-pVDZ

R=3.1 Angstroms

Interaction Energy=-2.42 kcal/mol

|   |             |             |            |
|---|-------------|-------------|------------|
| C | -1.06962900 | -2.18413200 | 0.00000000 |
|---|-------------|-------------|------------|

|   |             |             |             |
|---|-------------|-------------|-------------|
| C | -1.06962900 | -1.48761400 | -1.20800400 |
| C | -1.06962900 | -1.48761400 | 1.20800400  |
| C | -1.06962900 | -0.09543300 | -1.21907200 |
| C | -1.06962900 | -0.09543300 | 1.21907200  |
| C | -1.06962900 | 0.57008000  | 0.00000000  |
| H | -1.06962900 | -3.26576400 | 0.00000000  |
| H | -1.06962900 | -2.02763200 | -2.14510600 |
| H | -1.06962900 | -2.02763200 | 2.14510600  |
| H | -1.06962900 | 0.47098200  | -2.13807800 |
| H | -1.06962900 | 0.47098200  | 2.13807800  |
| N | -1.06962900 | 2.04105400  | 0.00000000  |
| O | -1.06962900 | 2.60970200  | -1.09054600 |
| O | -1.06962900 | 2.60970200  | 1.09054600  |
| O | 2.03037100  | -0.80702700 | 0.00000000  |
| C | 2.83316100  | -1.96878300 | 0.00000000  |
| H | 2.16518800  | -2.82590600 | 0.00000000  |
| H | 3.47123700  | -2.00674900 | -0.88948800 |
| H | 3.47123700  | -2.00674900 | 0.88948800  |
| C | 2.83316100  | 0.35472900  | 0.00000000  |
| H | 2.16518800  | 1.21185200  | 0.00000000  |
| H | 3.47123700  | 0.39269500  | 0.88948800  |
| H | 3.47123700  | 0.39269500  | -0.88948800 |

(CH3)2O-C6H5NO2 LP towards staggered dimer MP2/aug-cc-pVDZ  
R=3.1 Angstroms

Interaction Energy=-2.38 kcal/mol

|   |             |             |             |
|---|-------------|-------------|-------------|
| C | 1.06962900  | -2.18413200 | 0.00000000  |
| C | 1.06962900  | -1.48761400 | 1.20800400  |
| C | 1.06962900  | -1.48761400 | -1.20800400 |
| C | 1.06962900  | -0.09543300 | 1.21907200  |
| C | 1.06962900  | -0.09543300 | -1.21907200 |
| C | 1.06962900  | 0.57008000  | 0.00000000  |
| H | 1.06962900  | -3.26576400 | 0.00000000  |
| H | 1.06962900  | -2.02763200 | 2.14510600  |
| H | 1.06962900  | -2.02763200 | -2.14510600 |
| H | 1.06962900  | 0.47098200  | 2.13807800  |
| H | 1.06962900  | 0.47098200  | -2.13807800 |
| N | 1.06962900  | 2.04105400  | 0.00000000  |
| O | 1.06962900  | 2.60970200  | 1.09054600  |
| O | 1.06962900  | 2.60970200  | -1.09054600 |
| O | -2.03037100 | -0.80702700 | 0.00000000  |
| C | -2.83316100 | -0.80702700 | 1.16175600  |
| H | -2.16518800 | -0.80702700 | 2.01887900  |
| H | -3.47123700 | 0.08246100  | 1.19972200  |
| H | -3.47123700 | -1.69651400 | 1.19972200  |
| C | -2.83316100 | -0.80702700 | -1.16175600 |
| H | -2.16518800 | -0.80702700 | -2.01887900 |
| H | -3.47123700 | -1.69651400 | -1.19972200 |
| H | -3.47123700 | 0.08246100  | -1.19972200 |

(CH3)2O-C6H5CN LP towards eclipsed dimer MP2/aug-cc-pVDZ  
R=3.1 Angstroms

Interaction Energy=-2.41 kcal/mol

|   |             |             |            |
|---|-------------|-------------|------------|
| C | -1.20333200 | -1.92216300 | 0.00000000 |
|---|-------------|-------------|------------|

|   |             |             |             |
|---|-------------|-------------|-------------|
| C | -1.20333200 | -1.22556200 | -1.20782300 |
| C | -1.20333200 | -1.22556200 | 1.20782300  |
| C | -1.20333200 | 0.16536700  | -1.21508800 |
| C | -1.20333200 | 0.16536700  | 1.21508800  |
| C | -1.20333200 | 0.86006400  | 0.00000000  |
| H | -1.20333200 | -3.00393400 | 0.00000000  |
| H | -1.20333300 | -1.76535500 | -2.14516100 |
| H | -1.20333300 | -1.76535500 | 2.14516100  |
| H | -1.20333200 | 0.71638700  | -2.14577500 |
| H | -1.20333200 | 0.71638700  | 2.14577500  |
| C | -1.20333200 | 2.29142600  | 0.00000000  |
| N | -1.20333200 | 3.46507700  | 0.00000000  |
| O | 1.89666800  | -0.53105000 | 0.00000000  |
| C | 2.69945700  | -1.69280600 | 0.00000000  |
| H | 2.03148400  | -2.54992800 | 0.00000000  |
| H | 3.33753400  | -1.73077200 | -0.88948800 |
| H | 3.33753400  | -1.73077200 | 0.88948800  |
| C | 2.69945700  | 0.63070600  | 0.00000000  |
| H | 2.03148400  | 1.48782900  | 0.00000000  |
| H | 3.33753400  | 0.66867200  | 0.88948800  |
| H | 3.33753400  | 0.66867200  | -0.88948800 |

(CH<sub>3</sub>)<sub>2</sub>O-C<sub>6</sub>H<sub>5</sub>CN LP towards staggered dimer MP2/aug-cc-pVDZ

R=3.1 Angstroms

Interaction Energy=-2.16 kcal/mol

|   |             |             |             |
|---|-------------|-------------|-------------|
| C | -0.08853300 | 2.26602700  | 0.00000000  |
| C | -0.43483600 | 1.66160400  | 1.20782300  |
| C | -0.43483500 | 1.66160400  | -1.20782300 |
| C | -1.12631000 | 0.45473000  | 1.21508800  |
| C | -1.12631000 | 0.45473000  | -1.21508800 |
| C | -1.47166600 | -0.14804100 | 0.00000000  |
| H | 0.44925000  | 3.20465400  | 0.00000000  |
| H | -0.16648800 | 2.12996900  | 2.14516100  |
| H | -0.16648700 | 2.12996900  | -2.14516100 |
| H | -1.40024000 | -0.02337700 | 2.14577500  |
| H | -1.40024000 | -0.02337700 | -2.14577500 |
| C | -2.18324200 | -1.38999800 | 0.00000000  |
| N | -2.76670100 | -2.40834600 | 0.00000000  |
| O | 1.90969300  | -0.48211600 | 0.00000000  |
| C | 2.60625300  | -0.88120800 | 1.16175600  |
| H | 2.02666900  | -0.54913800 | 2.01887900  |
| H | 2.71770300  | -1.97020300 | 1.19972200  |
| H | 3.60208900  | -0.42663000 | 1.19972300  |
| C | 2.60625300  | -0.88120700 | -1.16175600 |
| H | 2.02667000  | -0.54913700 | -2.01887900 |
| H | 3.60208900  | -0.42662900 | -1.19972200 |
| H | 2.71770400  | -1.97020200 | -1.19972200 |

(CH<sub>3</sub>)<sub>2</sub>O-C<sub>6</sub>H<sub>5</sub>CF<sub>3</sub> LP towards eclipsed F towards dimer MP2/aug-cc-pVDZ

R=3.3 Angstroms

Interaction Energy=-1.98 kcal/mol

|   |             |            |             |
|---|-------------|------------|-------------|
| C | -1.04516400 | 2.44955300 | 0.00115700  |
| C | -0.54376500 | 1.96590500 | -1.20613900 |
| C | -0.54376500 | 1.96590500 | 1.20845300  |

|   |             |             |             |
|---|-------------|-------------|-------------|
| C | 0.45821100  | 0.99930200  | -1.21049200 |
| C | 0.45821100  | 0.99930200  | 1.21280600  |
| C | 0.95515900  | 0.52247000  | 0.00115700  |
| H | -1.82179800 | 3.20270400  | 0.00115700  |
| H | -0.92986600 | 2.34302300  | -2.14363100 |
| H | -0.92986600 | 2.34302300  | 2.14594500  |
| H | 0.85613200  | 0.62289000  | -2.14273200 |
| H | 0.85613200  | 0.62289000  | 2.14504600  |
| C | 1.99684100  | -0.55375300 | 0.00115700  |
| F | 1.43981800  | -1.78132900 | 0.00115700  |
| F | 2.79059600  | -0.48823700 | -1.08109700 |
| F | 2.79059600  | -0.48823700 | 1.08341100  |
| O | -2.33681100 | -0.88966400 | -0.00260600 |
| C | -3.73028900 | -0.66083300 | -0.00352800 |
| H | -3.88339100 | 0.41499500  | -0.00276800 |
| H | -4.19991500 | -1.09296600 | -0.89374400 |
| H | -4.20133100 | -1.09442300 | 0.88523100  |
| C | -2.05806700 | -2.27402200 | -0.00351800 |
| H | -0.97743300 | -2.38837600 | -0.00275200 |
| H | -2.47446000 | -2.76033100 | 0.88524100  |
| H | -2.47304400 | -2.75887400 | -0.89373400 |

(CH<sub>3</sub>)<sub>2</sub>O-C<sub>6</sub>H<sub>5</sub>CF<sub>3</sub> LP towards staggered F towards dimer MP2/aug-cc-pVDZ

R=3.1 Angstroms

Interaction Energy=-1.92 kcal/mol

|   |             |             |             |
|---|-------------|-------------|-------------|
| C | 1.09650700  | 2.40523900  | -0.00109800 |
| C | 0.59205900  | 1.92477400  | 1.20619800  |
| C | 0.59205900  | 1.92477400  | -1.20839400 |
| C | -0.41601300 | 0.96452900  | 1.21055100  |
| C | -0.41601300 | 0.96452900  | -1.21274700 |
| C | -0.91596900 | 0.49085100  | -0.00109800 |
| H | 1.87789200  | 3.15346100  | -0.00109800 |
| H | 0.98053800  | 2.29944100  | 2.14369000  |
| H | 0.98053800  | 2.29944100  | -2.14588600 |
| H | -0.81630800 | 0.59064200  | 2.14279100  |
| H | -0.81630800 | 0.59064200  | -2.14498700 |
| C | -1.96443900 | -0.57875900 | -0.00109800 |
| F | -1.41519400 | -1.80983500 | -0.00109800 |
| F | -2.75776400 | -0.50822200 | 1.08115600  |
| F | -2.75776400 | -0.50822200 | -1.08335200 |
| O | 2.22905600  | -0.79726900 | 0.00243700  |
| C | 2.78183800  | -1.37759000 | 1.16510900  |
| H | 2.32044500  | -0.89322200 | 2.02146800  |
| H | 2.57784700  | -2.45307300 | 1.20380000  |
| H | 3.86595900  | -1.22607500 | 1.20380800  |
| C | 2.78367500  | -1.37950500 | -1.15840200 |
| H | 2.32363800  | -0.89654900 | -2.01628700 |
| H | 3.86785600  | -1.22805200 | -1.19563500 |
| H | 2.57974500  | -2.45505000 | -1.19564200 |

(CH<sub>3</sub>)<sub>2</sub>O-C<sub>6</sub>H<sub>5</sub>CF<sub>3</sub> LP towards eclipsed F away dimer MP2/aug-cc-pVDZ

R=3.1 Angstroms

Interaction Energy=-2.08 kcal/mol

|   |             |            |            |
|---|-------------|------------|------------|
| C | -1.22246900 | 2.32507200 | 0.00110100 |
|---|-------------|------------|------------|

|   |             |             |             |
|---|-------------|-------------|-------------|
| C | -0.69910300 | 1.86528500  | 1.20839700  |
| C | -0.69910300 | 1.86528500  | -1.20619500 |
| C | 0.34687100  | 0.94647200  | 1.21275000  |
| C | 0.34687100  | 0.94647200  | -1.21054800 |
| C | 0.86307700  | 0.49055800  | 0.00110100  |
| H | -2.03712600 | 3.03692200  | 0.00110100  |
| H | -1.10678900 | 2.21895600  | 2.14588900  |
| H | -1.10678900 | 2.21895600  | -2.14368700 |
| H | 0.75483000  | 0.58096300  | 2.14499000  |
| H | 0.75483000  | 0.58096300  | -2.14278800 |
| C | 2.02157200  | -0.45878100 | 0.00110100  |
| F | 3.19900700  | 0.19762100  | 0.00110100  |
| F | 2.02176700  | -1.25523600 | 1.08335500  |
| F | 2.02176700  | -1.25523600 | -1.08115300 |
| O | -2.22495300 | -0.92050100 | -0.00244500 |
| C | -3.62759000 | -0.75692100 | -0.00335700 |
| H | -3.83070900 | 0.31059500  | -0.00259100 |
| H | -4.07655200 | -1.21048500 | -0.89357300 |
| H | -4.07788700 | -1.21201600 | 0.88540100  |
| C | -1.88193700 | -2.29035000 | -0.00336700 |
| H | -0.79714500 | -2.35417100 | -0.00260800 |
| H | -2.27518700 | -2.79555800 | 0.88539100  |
| H | -2.27385200 | -2.79402700 | -0.89358300 |

(CH<sub>3</sub>)<sub>2</sub>O-C<sub>6</sub>H<sub>5</sub>CF<sub>3</sub> LP towards staggered F away dimer MP2/aug-cc-pVDZ

R=3.1 Angstroms

Interaction Energy=-1.93 kcal/mol

|   |             |             |             |
|---|-------------|-------------|-------------|
| C | 1.07438800  | 2.39709900  | -0.00110100 |
| C | 0.58085900  | 1.90542300  | -1.20839700 |
| C | 0.58085900  | 1.90542300  | 1.20619500  |
| C | -0.40549200 | 0.92287900  | -1.21275000 |
| C | -0.40549200 | 0.92287900  | 1.21054800  |
| C | -0.89211700 | 0.43551800  | -0.00110100 |
| H | 1.84284300  | 3.15859300  | -0.00110100 |
| H | 0.96558500  | 2.28394300  | -2.14588900 |
| H | 0.96558500  | 2.28394300  | 2.14368700  |
| H | -0.78974700 | 0.53252700  | -2.14499000 |
| H | -0.78974700 | 0.53252700  | 2.14278800  |
| C | -1.98885500 | -0.58454300 | -0.00110100 |
| F | -3.20510400 | -0.00320300 | -0.00110100 |
| F | -1.93914700 | -1.37944500 | -1.08335500 |
| F | -1.93914700 | -1.37944500 | 1.08115300  |
| O | 2.27825600  | -0.77928700 | 0.00244500  |
| C | 2.84388200  | -1.34709700 | 1.16511800  |
| H | 2.37178000  | -0.87316100 | 2.02147700  |
| H | 2.66398900  | -2.42687100 | 1.20381600  |
| H | 3.92434400  | -1.17138000 | 1.20380900  |
| C | 2.84574800  | -1.34898400 | -1.15839300 |
| H | 2.37502300  | -0.87644000 | -2.01627800 |
| H | 3.92627100  | -1.17332800 | -1.19563400 |
| H | 2.66591600  | -2.42882000 | -1.19562700 |

(CH<sub>3</sub>)<sub>2</sub>O-C<sub>6</sub>H<sub>5</sub>Br LP towards eclipsed dimer MP2/aug-cc-pVDZ

R=3.1 Angstroms

Interaction Energy=-2.03 kcal/mol

|    |             |             |             |
|----|-------------|-------------|-------------|
| C  | -0.94379000 | 2.48796800  | 0.00000000  |
| C  | -0.94379000 | 1.78893800  | 1.20545100  |
| C  | -0.94379000 | 1.78893800  | -1.20545100 |
| C  | -0.94379000 | 0.39529300  | 1.21387200  |
| C  | -0.94379000 | 0.39529300  | -1.21387200 |
| C  | -0.94379000 | -0.28664400 | 0.00000000  |
| H  | -0.94379000 | 3.56939800  | 0.00000000  |
| H  | -0.94379000 | 2.32561700  | 2.14486500  |
| H  | -0.94379000 | 2.32561700  | -2.14486500 |
| H  | -0.94379000 | -0.15521400 | 2.14419000  |
| H  | -0.94379000 | -0.15521400 | -2.14419000 |
| Br | -0.94379000 | -2.16988900 | 0.00000000  |
| O  | 2.15621000  | 1.10066300  | 0.00000000  |
| C  | 2.95899900  | 2.26241900  | 0.00000000  |
| H  | 2.29102700  | 3.11954100  | 0.00000000  |
| H  | 3.59707600  | 2.30038500  | 0.88948800  |
| H  | 3.59707600  | 2.30038500  | -0.88948800 |
| C  | 2.95899900  | -0.06109400 | 0.00000000  |
| H  | 2.29102600  | -0.91821600 | 0.00000000  |
| H  | 3.59707600  | -0.09906000 | -0.88948800 |
| H  | 3.59707600  | -0.09906000 | 0.88948800  |

(CH3)2O-C6H5Br LP towards staggered dimer MP2/aug-cc-pVDZ

R=3.1 Angstroms

Interaction Energy=-1.70 kcal/mol

|    |             |             |             |
|----|-------------|-------------|-------------|
| C  | -0.94379000 | -2.48796800 | 0.00000000  |
| C  | -0.94379000 | -1.78893800 | -1.20545100 |
| C  | -0.94379000 | -1.78893800 | 1.20545100  |
| C  | -0.94379000 | -0.39529300 | -1.21387200 |
| C  | -0.94379000 | -0.39529300 | 1.21387200  |
| C  | -0.94379000 | 0.28664400  | 0.00000000  |
| H  | -0.94379000 | -3.56939800 | 0.00000000  |
| H  | -0.94379000 | -2.32561700 | -2.14486500 |
| H  | -0.94379000 | -2.32561700 | 2.14486500  |
| H  | -0.94379000 | 0.15521400  | -2.14419000 |
| H  | -0.94379000 | 0.15521400  | 2.14419000  |
| Br | -0.94379000 | 2.16988900  | 0.00000000  |
| O  | 2.15621000  | -1.10066300 | 0.00000000  |
| C  | 2.95899900  | -1.10066300 | -1.16175600 |
| H  | 2.29102600  | -1.10066300 | -2.01887900 |
| H  | 3.59707600  | -0.21117500 | -1.19972200 |
| H  | 3.59707600  | -1.99015000 | -1.19972200 |
| C  | 2.95899900  | -1.10066300 | 1.16175600  |
| H  | 2.29102600  | -1.10066300 | 2.01887900  |
| H  | 3.59707600  | -1.99015000 | 1.19972200  |
| H  | 3.59707600  | -0.21117500 | 1.19972200  |

(CH3)2O-C6H5Cl LP towards eclipsed dimer MP2/aug-cc-pVDZ

R=3.1 Angstroms

Interaction Energy=-1.91 kcal/mol

|   |            |             |             |
|---|------------|-------------|-------------|
| C | 1.14603100 | -1.99305400 | 0.00000000  |
| C | 1.14602900 | -1.29370800 | 1.20573600  |
| C | 1.14602900 | -1.29370800 | -1.20573600 |

|    |             |             |             |
|----|-------------|-------------|-------------|
| C  | 1.14602900  | 0.09977300  | 1.21389000  |
| C  | 1.14602900  | 0.09977300  | -1.21389000 |
| C  | 1.14603100  | 0.78056400  | 0.00000000  |
| H  | 1.14603100  | -3.07449200 | 0.00000000  |
| H  | 1.14602800  | -1.83014500 | 2.14538700  |
| H  | 1.14602800  | -1.83014500 | -2.14538700 |
| H  | 1.14602900  | 0.65454700  | 2.14171100  |
| H  | 1.14602900  | 0.65454700  | -2.14171100 |
| Cl | 1.14603100  | 2.51707000  | 0.00000000  |
| O  | -1.95396900 | -0.60624400 | 0.00000000  |
| C  | -2.75675900 | -1.76800000 | 0.00000000  |
| H  | -2.08878600 | -2.62512300 | 0.00000000  |
| H  | -3.39483600 | -1.80596700 | 0.88948500  |
| H  | -3.39483600 | -1.80596700 | -0.88948500 |
| C  | -2.75675900 | 0.55551200  | 0.00000000  |
| H  | -2.08878600 | 1.41263500  | 0.00000000  |
| H  | -3.39483500 | 0.59348000  | -0.88948700 |
| H  | -3.39483500 | 0.59348000  | 0.88948700  |

(CH<sub>3</sub>)<sub>2</sub>O-C<sub>6</sub>H<sub>5</sub>Cl LP towards staggered dimer MP2/aug-cc-pVDZ

R=3.1 Angstroms

Interaction Energy=-1.62 kcal/mol

|    |             |             |             |
|----|-------------|-------------|-------------|
| C  | -1.14603100 | -1.99305400 | 0.00000000  |
| C  | -1.14603000 | -1.29370900 | -1.20573500 |
| C  | -1.14603000 | -1.29370900 | 1.20573500  |
| C  | -1.14603000 | 0.09977200  | -1.21389000 |
| C  | -1.14603000 | 0.09977200  | 1.21389000  |
| C  | -1.14603100 | 0.78056400  | 0.00000000  |
| H  | -1.14603100 | -3.07449200 | 0.00000000  |
| H  | -1.14602900 | -1.83014600 | -2.14538600 |
| H  | -1.14602900 | -1.83014600 | 2.14538600  |
| H  | -1.14602900 | 0.65454600  | -2.14171100 |
| H  | -1.14602900 | 0.65454600  | 2.14171100  |
| Cl | -1.14603100 | 2.51707000  | 0.00000000  |
| O  | 1.95396900  | -0.60624400 | 0.00000000  |
| C  | 2.75676000  | -0.60624600 | -1.16175500 |
| H  | 2.08878700  | -0.60624800 | -2.01887900 |
| H  | 3.39483600  | 0.28324200  | -1.19972300 |
| H  | 3.39483600  | -1.49573400 | -1.19971900 |
| C  | 2.75676000  | -0.60624600 | 1.16175500  |
| H  | 2.08878700  | -0.60624800 | 2.01887900  |
| H  | 3.39483600  | -1.49573400 | 1.19971900  |
| H  | 3.39483600  | 0.28324200  | 1.19972300  |

(CH<sub>3</sub>)<sub>2</sub>O-C<sub>6</sub>H<sub>5</sub>F LP towards eclipsed dimer MP2/aug-cc-pVDZ

R=3.1 Angstroms

Interaction Energy=-1.44 kcal/mol

|   |            |             |             |
|---|------------|-------------|-------------|
| C | 0.80914100 | -1.93912800 | 0.00000000  |
| C | 0.98303200 | -1.26304200 | 1.20660000  |
| C | 0.98303300 | -1.26304200 | -1.20659900 |
| C | 1.33021000 | 0.08677400  | 1.21548100  |
| C | 1.33021100 | 0.08677400  | -1.21548100 |
| C | 1.49617200 | 0.73202700  | 0.00000000  |
| H | 0.53979800 | -2.98632400 | 0.00000000  |

|   |             |             |             |
|---|-------------|-------------|-------------|
| H | 0.84909300  | -1.78379200 | 2.14526200  |
| H | 0.84909400  | -1.78379300 | -2.14526100 |
| H | 1.47137200  | 0.63560700  | 2.13586400  |
| H | 1.47137300  | 0.63560600  | -2.13586400 |
| F | 1.83239300  | 2.03924200  | 0.00000000  |
| O | -1.84962800 | 0.16864800  | 0.00000000  |
| C | -2.91650100 | -0.75651600 | 0.00000000  |
| H | -2.48309000 | -1.75301100 | 0.00000000  |
| H | -3.54392200 | -0.63434300 | 0.88948700  |
| H | -3.54392200 | -0.63434200 | -0.88948800 |
| C | -2.33772300 | 1.49375600  | 0.00000000  |
| H | -1.47729900 | 2.15747200  | 0.00000000  |
| H | -2.94622900 | 1.68946800  | -0.88948800 |
| H | -2.94622900 | 1.68946800  | 0.88948800  |

(CH3)2O-C6H5F LP towards staggered dimer MP2/aug-cc-pVDZ

R=3.1 Angstroms

Interaction Energy=-1.35 kcal/mol

|   |             |             |             |
|---|-------------|-------------|-------------|
| C | 0.89660700  | 1.90026900  | 0.00000000  |
| C | 1.03953000  | 1.21696600  | -1.20659900 |
| C | 1.03953100  | 1.21696500  | 1.20660000  |
| C | 1.32487900  | -0.14726000 | -1.21548200 |
| C | 1.32487900  | -0.14726100 | 1.21548100  |
| C | 1.46128400  | -0.79940200 | 0.00000000  |
| H | 0.67523200  | 2.95864400  | 0.00000100  |
| H | 0.92944400  | 1.74327600  | -2.14526100 |
| H | 0.92944500  | 1.74327500  | 2.14526200  |
| H | 1.44090000  | -0.70195100 | -2.13586500 |
| H | 1.44090100  | -0.70195200 | 2.13586400  |
| F | 1.73762600  | -2.12057200 | -0.00000100 |
| O | -1.85538900 | -0.08424300 | 0.00000000  |
| C | -2.64117300 | -0.24860100 | -1.16175600 |
| H | -1.98735000 | -0.11184300 | -2.01887900 |
| H | -3.08362500 | -1.24988300 | -1.19972300 |
| H | -3.44784300 | 0.49141000  | -1.19972100 |
| C | -2.64117300 | -0.24860200 | 1.16175600  |
| H | -1.98734900 | -0.11184600 | 2.01887900  |
| H | -3.44784200 | 0.49140800  | 1.19972300  |
| H | -3.08362500 | -1.24988500 | 1.19972200  |

(CH3)2O-C6H6 LP towards eclipsed dimer MP2/aug-cc-pVDZ

R=3.2 Angstroms

Interaction Energy=-0.87 kcal/mol

|   |             |             |             |
|---|-------------|-------------|-------------|
| C | 0.00000000  | 1.39150000  | -1.45392000 |
| C | -1.20507400 | 0.69575000  | -1.45392000 |
| C | 1.20507400  | 0.69575000  | -1.45392000 |
| C | -1.20507400 | -0.69575000 | -1.45392000 |
| C | 1.20507400  | -0.69575000 | -1.45392000 |
| C | 0.00000000  | -1.39150000 | -1.45392000 |
| H | 0.00000000  | 2.47150000  | -1.45392000 |
| H | -2.14038200 | 1.23575000  | -1.45392000 |
| H | 2.14038200  | 1.23575000  | -1.45392000 |
| H | -2.14038200 | -1.23575000 | -1.45392000 |
| H | 2.14038200  | -1.23575000 | -1.45392000 |



|   |             |             |             |
|---|-------------|-------------|-------------|
| H | 0.00000000  | -2.47150000 | -1.45392000 |
| O | 0.00000000  | 0.00000000  | 1.74608000  |
| C | 0.00000000  | 1.16175600  | 2.54886900  |
| H | 0.00000000  | 2.01887900  | 1.88089600  |
| H | -0.88948800 | 1.19972200  | 3.18694600  |
| H | 0.88948800  | 1.19972200  | 3.18694600  |
| C | 0.00000000  | -1.16175600 | 2.54886900  |
| H | 0.00000000  | -2.01887900 | 1.88089600  |
| H | 0.88948800  | -1.19972200 | 3.18694600  |
| H | -0.88948800 | -1.19972200 | 3.18694600  |

(CH<sub>3</sub>)<sub>2</sub>O-C<sub>6</sub>H<sub>6</sub> LP towards staggered dimer MP2/aug-cc-pVDZ

R=3.2 Angstroms

Interaction Energy=-0.88 kcal/mol

|   |             |             |             |
|---|-------------|-------------|-------------|
| C | 0.00000000  | 1.39150000  | -1.45392000 |
| C | -1.20507400 | 0.69575000  | -1.45392000 |
| C | 1.20507400  | 0.69575000  | -1.45392000 |
| C | -1.20507400 | -0.69575000 | -1.45392000 |
| C | 1.20507400  | -0.69575000 | -1.45392000 |
| C | 0.00000000  | -1.39150000 | -1.45392000 |
| H | 0.00000000  | 2.47150000  | -1.45392000 |
| H | -2.14038200 | 1.23575000  | -1.45392000 |
| H | 2.14038200  | 1.23575000  | -1.45392000 |
| H | -2.14038200 | -1.23575000 | -1.45392000 |
| H | 2.14038200  | -1.23575000 | -1.45392000 |
| H | 0.00000000  | -2.47150000 | -1.45392000 |
| O | 0.00000000  | 0.00000000  | 1.74608000  |
| C | -1.16175600 | 0.00000000  | 2.54886900  |
| H | -2.01887900 | 0.00000000  | 1.88089600  |
| H | -1.19972200 | -0.88948800 | 3.18694600  |
| H | -1.19972200 | 0.88948800  | 3.18694600  |
| C | 1.16175600  | 0.00000000  | 2.54886900  |
| H | 2.01887900  | 0.00000000  | 1.88089600  |
| H | 1.19972200  | 0.88948800  | 3.18694600  |
| H | 1.19972200  | -0.88948800 | 3.18694600  |

(CH<sub>3</sub>)<sub>2</sub>O-C<sub>6</sub>H<sub>5</sub>CH<sub>3</sub> LP towards eclipsed H towards dimer MP2/aug-cc-pVDZ

R=3.2 Angstroms

Interaction Energy=-0.94 kcal/mol

|   |             |             |             |
|---|-------------|-------------|-------------|
| C | -0.78653300 | -2.01994100 | 0.00090200  |
| C | -0.98018100 | -1.34546900 | -1.20328900 |
| C | -0.97509100 | -1.34367600 | 1.20489400  |
| C | -1.35849400 | -0.00406900 | -1.19940200 |
| C | -1.35342200 | -0.00228200 | 1.20060900  |
| C | -1.54795300 | 0.68714400  | 0.00049500  |
| H | -0.49621300 | -3.06226400 | 0.00106400  |
| H | -0.84124200 | -1.86333700 | -2.14365000 |
| H | -0.83217700 | -1.86014300 | 2.14543000  |
| H | -1.51196300 | 0.51318400  | -2.13959600 |
| H | -1.50291800 | 0.51637100  | 2.14067200  |
| C | -1.92296300 | 2.14271800  | 0.00020400  |
| H | -1.03194200 | 2.77286000  | -0.00214900 |
| H | -2.51025700 | 2.39588800  | -0.88154300 |
| H | -2.50652600 | 2.39720200  | 0.88404700  |

|   |            |             |             |
|---|------------|-------------|-------------|
| O | 1.91164300 | 0.20196300  | -0.00088500 |
| C | 2.99964600 | -0.69825800 | -0.00111500 |
| H | 2.58941800 | -1.70451800 | -0.00066100 |
| H | 3.62368200 | -0.56183700 | -0.89091300 |
| H | 3.62446000 | -0.56135100 | 0.88806200  |
| C | 2.36893400 | 1.53801400  | -0.00144900 |
| H | 1.49337800 | 2.18163500  | -0.00124100 |
| H | 2.97313700 | 1.74800100  | 0.88771700  |
| H | 2.97235800 | 1.74751600  | -0.89125800 |

(CH3)2O-C6H5CH3 LP towards staggered H towards dimer MP2/aug-cc-pVDZ

R=3.1 Angstroms

Interaction Energy=-1.12 kcal/mol

|   |             |             |             |
|---|-------------|-------------|-------------|
| C | -0.82118100 | -1.98401500 | 0.00165600  |
| C | -0.99203100 | -1.30379500 | -1.20275100 |
| C | -0.98663200 | -1.30134400 | 1.20543000  |
| C | -1.32475900 | 0.04963400  | -1.19929700 |
| C | -1.31937800 | 0.05207700  | 1.20071200  |
| C | -1.49060600 | 0.74727400  | 0.00037600  |
| H | -0.56628000 | -3.03556100 | 0.00215500  |
| H | -0.87078600 | -1.82639100 | -2.14294500 |
| H | -0.86116900 | -1.82202500 | 2.14613200  |
| H | -1.46074400 | 0.57145700  | -2.13965800 |
| H | -1.45114700 | 0.57581400  | 2.14060800  |
| C | -1.81617000 | 2.21469800  | -0.00038800 |
| H | -0.90434700 | 2.81434300  | -0.00304200 |
| H | -2.39465800 | 2.48728200  | -0.88216800 |
| H | -2.39069900 | 2.48907900  | 0.88342100  |
| O | 1.85349300  | 0.12148400  | -0.00108800 |
| C | 2.63242800  | 0.31244200  | -1.16338900 |
| H | 1.98329800  | 0.15245300  | -2.02005800 |
| H | 3.03967600  | 1.32852000  | -1.20219200 |
| H | 3.46438900  | -0.39901400 | -1.20138500 |
| C | 2.63370900  | 0.31384300  | 1.16012200  |
| H | 1.98552400  | 0.15488800  | 2.01769900  |
| H | 3.46571200  | -0.39756700 | 1.19805900  |
| H | 3.04099900  | 1.32996700  | 1.19725100  |

(CH3)2O-C6H5CH3 LP towards eclipsed H away dimer MP2/aug-cc-pVDZ

R=3.2 Angstroms

Interaction Energy=-0.98 kcal/mol

|   |             |             |             |
|---|-------------|-------------|-------------|
| C | -0.75754000 | -2.02530400 | 0.00095800  |
| C | -0.95179900 | -1.35059200 | 1.20491500  |
| C | -0.95683300 | -1.35254100 | -1.20326700 |
| C | -1.34368900 | -0.01309700 | 1.20056600  |
| C | -1.34870700 | -0.01504000 | -1.19944500 |
| C | -1.55015800 | 0.67281100  | 0.00043100  |
| H | -0.44993600 | -3.06265800 | 0.00115500  |
| H | -0.79456500 | -1.86287500 | 2.14545400  |
| H | -0.80353100 | -1.86634800 | -2.14362500 |
| H | -1.48846500 | 0.50698100  | 2.14058100  |
| H | -1.49741300 | 0.50351500  | -2.13968700 |
| C | -2.00548700 | 2.10529200  | 0.00022300  |
| H | -3.09512800 | 2.16598000  | 0.00245200  |

|   |             |             |             |
|---|-------------|-------------|-------------|
| H | -1.64241900 | 2.63200400  | 0.88183700  |
| H | -1.64611000 | 2.63057400  | -0.88375300 |
| O | 1.91801200  | 0.22379300  | -0.00088400 |
| C | 3.01507000  | -0.66537100 | -0.00106000 |
| H | 2.61504700  | -1.67573100 | -0.00057000 |
| H | 3.63770600  | -0.52267800 | -0.89085500 |
| H | 3.63845300  | -0.52211000 | 0.88812000  |
| C | 2.36175800  | 1.56440300  | -0.00149800 |
| H | 1.47973300  | 2.19913000  | -0.00133100 |
| H | 2.96379100  | 1.78053200  | 0.88766800  |
| H | 2.96304400  | 1.77996400  | -0.89130800 |

(CH3)2O-C6H5CH3 LP towards staggered H away dimer MP2/aug-cc-pVDZ

R=3.2 Angstroms

Interaction Energy=-0.99 kcal/mol

|   |             |             |             |
|---|-------------|-------------|-------------|
| C | -0.85755800 | -1.98502200 | 0.00177400  |
| C | -1.01787100 | -1.30100100 | 1.20547700  |
| C | -1.02313800 | -1.30362600 | -1.20270500 |
| C | -1.34260100 | 0.05436500  | 1.20062300  |
| C | -1.34785000 | 0.05174900  | -1.19938600 |
| C | -1.51469200 | 0.74925000  | 0.00023100  |
| H | -0.60204900 | -3.03642100 | 0.00236100  |
| H | -0.88631500 | -1.82012300 | 2.14620900  |
| H | -0.89569500 | -1.82479800 | -2.14286900 |
| H | -1.46121600 | 0.58137500  | 2.14044300  |
| H | -1.47057600 | 0.57671000  | -2.13982400 |
| C | -1.89804600 | 2.20264700  | -0.00051500 |
| H | -2.98330600 | 2.31757900  | 0.00173300  |
| H | -1.50912100 | 2.71094500  | 0.88088000  |
| H | -1.51298200 | 2.70902100  | -0.88470900 |
| O | 1.92678400  | 0.12790200  | -0.00104600 |
| C | 2.70690600  | 0.31414600  | -1.16331500 |
| H | 2.05689200  | 0.15793200  | -2.02001100 |
| H | 3.12016600  | 1.32779200  | -1.20217900 |
| H | 3.53464300  | -0.40222600 | -1.20120100 |
| C | 2.70805400  | 0.31573500  | 1.16019600  |
| H | 2.05888700  | 0.16069300  | 2.01774600  |
| H | 3.53582800  | -0.40058500 | 1.19824300  |
| H | 3.12135100  | 1.32943300  | 1.19726500  |

(CH3)2O-C6H5OCH3 LP towards eclipsed O-LP towards dimer MP2/aug-cc-pVDZ

R=3.1 Angstroms

Interaction Energy=-1.47 kcal/mol

|   |             |             |             |
|---|-------------|-------------|-------------|
| C | 0.23143600  | 2.21555300  | 0.00141200  |
| C | -0.14261400 | 1.62444500  | 1.20764300  |
| C | -0.89568000 | 0.45176400  | 1.21002500  |
| C | -1.27061600 | -0.12789800 | -0.00032800 |
| C | -0.89923400 | 0.45583900  | -1.20981800 |
| C | -0.14615900 | 1.62850800  | -1.20569900 |
| H | 0.81833300  | 3.12417800  | 0.00208000  |
| H | 0.15553900  | 2.07233000  | 2.14655700  |
| H | -1.18595000 | -0.02939600 | 2.13511800  |
| H | -1.19222200 | -0.02220500 | -2.13566900 |
| H | 0.14923800  | 2.07955400  | -2.14397200 |

|   |             |             |             |
|---|-------------|-------------|-------------|
| O | -1.98899800 | -1.30545100 | -0.00125500 |
| C | -3.39507400 | -1.06759500 | 0.00121000  |
| H | -3.87787200 | -2.04077800 | 0.00028100  |
| H | -3.69137100 | -0.50915400 | 0.89222200  |
| H | -3.69398500 | -0.50615800 | -0.88704200 |
| O | 2.09031400  | -0.62901500 | -0.00075500 |
| C | 3.39309900  | -0.08413200 | -0.00036700 |
| H | 3.29325400  | 0.99793900  | 0.00044700  |
| H | 3.95080100  | -0.39715800 | 0.88887700  |
| H | 3.95077200  | -0.39582200 | -0.89009800 |
| C | 2.13927300  | -2.04030800 | -0.00181600 |
| H | 1.11437800  | -2.40147000 | -0.00207100 |
| H | 2.65597200  | -2.41592600 | -0.89159500 |
| H | 2.65600100  | -2.41726300 | 0.88738000  |

(CH<sub>3</sub>)<sub>2</sub>O-C<sub>6</sub>H<sub>5</sub>OCH<sub>3</sub> LP towards staggered O-LP towards dimer MP2/aug-cc-pVDZ  
R=3.1 Angstroms

Interaction Energy=-1.13 kcal/mol

|   |             |             |             |
|---|-------------|-------------|-------------|
| C | 0.10407500  | 2.22517300  | 0.00298300  |
| C | -0.23551200 | 1.61274900  | 1.20877400  |
| C | -0.92013000 | 0.39883500  | 1.21028400  |
| C | -1.26119700 | -0.20051000 | -0.00050100 |
| C | -0.92385100 | 0.40440400  | -1.20955700 |
| C | -0.23922300 | 1.61830400  | -1.20456500 |
| H | 0.63793100  | 3.16594100  | 0.00432800  |
| H | 0.03645800  | 2.07632400  | 2.14802300  |
| H | -1.18237000 | -0.09882300 | 2.13501900  |
| H | -1.18893600 | -0.08899300 | -2.13576300 |
| H | 0.02986100  | 2.08620000  | -2.14250100 |
| O | -1.91090900 | -1.41729900 | -0.00230300 |
| C | -3.32830700 | -1.26042200 | 0.00023800  |
| H | -3.75453500 | -2.25967600 | -0.00140700 |
| H | -3.65614500 | -0.72050900 | 0.89162200  |
| H | -3.65888100 | -0.71641400 | -0.88763900 |
| O | 2.12292800  | -0.50817800 | -0.00106000 |
| C | 2.82255800  | -0.90362400 | 1.16009900  |
| H | 2.24048300  | -0.57723900 | 2.01771700  |
| H | 2.94232900  | -1.99178900 | 1.19647800  |
| H | 3.81489200  | -0.44150400 | 1.19870300  |
| C | 2.82247900  | -0.90024600 | -1.16341100 |
| H | 2.24034500  | -0.57136800 | -2.02003700 |
| H | 3.81481000  | -0.43801500 | -1.20073900 |
| H | 2.94224800  | -1.98830000 | -1.20296300 |

(CH<sub>3</sub>)<sub>2</sub>O-C<sub>6</sub>H<sub>5</sub>OCH<sub>3</sub> LP towards eclipsed O-LP away dimer MP2/aug-cc-pVDZ  
R=3.8 Angstroms

Interaction Energy=-0.68 kcal/mol

|   |            |             |             |
|---|------------|-------------|-------------|
| C | 0.95988300 | -2.30510400 | 0.00009300  |
| C | 1.13925200 | -1.62937100 | -1.20635900 |
| C | 1.48808000 | -0.28007400 | -1.20918100 |
| C | 1.65891100 | 0.38920100  | 0.00095400  |
| C | 1.48313800 | -0.27956500 | 1.21066400  |
| C | 1.13432300 | -1.62886400 | 1.20698400  |
| H | 0.69191100 | -3.35307300 | -0.00023400 |

|   |             |             |             |
|---|-------------|-------------|-------------|
| H | 1.01299900  | -2.15270100 | -2.14510500 |
| H | 1.64374800  | 0.25956300  | -2.13445300 |
| H | 1.63502600  | 0.26046100  | 2.13633600  |
| H | 1.00423700  | -2.15179900 | 2.14542600  |
| O | 2.03487900  | 1.71636000  | 0.00144300  |
| C | 0.90505100  | 2.58648300  | -0.00104700 |
| H | 1.29111800  | 3.60193000  | -0.00047200 |
| H | 0.29381200  | 2.42423900  | -0.89189700 |
| H | 0.29017800  | 2.42461300  | 0.88736700  |
| O | -2.36882300 | -0.00364400 | -0.00063100 |
| C | -3.43763900 | -0.92656300 | -0.00123300 |
| H | -3.00632300 | -1.92396700 | -0.00129400 |
| H | -4.06513100 | -0.80326800 | 0.88805000  |
| H | -4.06447100 | -0.80287300 | -0.89092600 |
| C | -2.85413000 | 1.32248700  | -0.00051700 |
| H | -1.99231300 | 1.98439200  | -0.00005000 |
| H | -3.46189400 | 1.51967600  | -0.89018600 |
| H | -3.46255400 | 1.51928100  | 0.88878900  |

(CH3)2O-C6H5OCH3 LP towards staggered O-LP away dimer MP2/aug-cc-pVDZ  
R=3.1 Angstroms

Interaction Energy=-1.67 kcal/mol

|   |             |             |             |
|---|-------------|-------------|-------------|
| C | -0.51581600 | -2.31566100 | -0.00000500 |
| C | -0.76371700 | -1.66176200 | 1.20634300  |
| C | -1.24884100 | -0.35526200 | 1.20896000  |
| C | -1.48698700 | 0.29293000  | -0.00127700 |
| C | -1.24337500 | -0.35440800 | -1.21088400 |
| C | -0.75826700 | -1.66091000 | -1.20699900 |
| H | -0.14197200 | -3.33069300 | 0.00048100  |
| H | -0.58478800 | -2.16935700 | 2.14516600  |
| H | -1.45916300 | 0.16566400  | 2.13414500  |
| H | -1.44951700 | 0.16717200  | -2.13664200 |
| H | -0.57509800 | -2.16784200 | -2.14536300 |
| O | -1.99684000 | 1.57462900  | -0.00197600 |
| C | -0.96202200 | 2.55584100  | 0.00070700  |
| H | -1.45001200 | 3.52643100  | -0.00005200 |
| H | -0.33760700 | 2.45707900  | 0.89171900  |
| H | -0.33358800 | 2.45770800  | -0.88754400 |
| O | 1.90379000  | 0.07023500  | 0.00095300  |
| C | 2.65687600  | 0.35004100  | -1.16039000 |
| H | 2.03142800  | 0.11677200  | -2.01785600 |
| H | 2.94453600  | 1.40625000  | -1.19843400 |
| H | 3.56522300  | -0.26093400 | -1.19762300 |
| C | 2.65538700  | 0.35061700  | 1.16312200  |
| H | 2.02884100  | 0.11777300  | 2.01990100  |
| H | 3.56368600  | -0.26033900 | 1.20182100  |
| H | 2.94299900  | 1.40684500  | 1.20101000  |

(CH3)2O-C6H5N(CH3)2 LP towards eclipsed N-LP towards dimer MP2/aug-cc-pVDZ

R=3.1 Angstroms

Interaction Energy=-1.28 kcal/mol

|   |             |            |             |
|---|-------------|------------|-------------|
| C | -0.99507800 | 2.28834800 | 0.01591100  |
| C | -0.46438900 | 1.82274200 | -1.18364300 |

|   |             |             |             |
|---|-------------|-------------|-------------|
| C | -0.48751300 | 1.78319600  | 1.20945600  |
| C | 0.54841800  | 0.86902200  | -1.19567600 |
| C | 0.52517700  | 0.82927700  | 1.20953800  |
| C | 1.05649400  | 0.33477500  | 0.00345300  |
| H | -1.77951500 | 3.03148300  | 0.02061200  |
| H | -0.83195200 | 2.20689400  | -2.12588800 |
| H | -0.87333300 | 2.13612600  | 2.15660200  |
| H | 0.93627800  | 0.54076700  | -2.14724400 |
| H | 0.89468600  | 0.46963900  | 2.15705700  |
| N | 2.03258800  | -0.65779500 | -0.00351800 |
| C | 2.79970100  | -0.82009900 | -1.22189700 |
| C | 2.77607300  | -0.86050800 | 1.22342600  |
| H | 3.32830000  | 0.09472200  | -1.51829600 |
| H | 3.52996200  | -1.61027400 | -1.06961900 |
| H | 2.15535200  | -1.12445700 | -2.04409300 |
| H | 3.29855500  | 0.04385300  | 1.56004400  |
| H | 2.11605700  | -1.19165800 | 2.02251700  |
| H | 3.50939100  | -1.64545300 | 1.05926200  |
| O | -2.08937900 | -0.93936600 | -0.01159700 |
| C | -3.48549600 | -0.72722300 | -0.01214600 |
| H | -3.65146700 | 0.34666300  | -0.00384600 |
| H | -3.94918500 | -1.15856900 | -0.90585000 |
| H | -3.95204200 | -1.17276100 | 0.87306700  |
| C | -1.79408200 | -2.32024800 | -0.02213900 |
| H | -0.71215800 | -2.42166700 | -0.02121000 |
| H | -2.20535300 | -2.81784600 | 0.86274800  |
| H | -2.20249600 | -2.80365400 | -0.91616900 |

(CH<sub>3</sub>)<sub>2</sub>O-C<sub>6</sub>H<sub>5</sub>N(CH<sub>3</sub>)<sub>2</sub> LP towards staggered N-LP towards dimer MP2/aug-cc-pVDZ

R=3.1 Angstroms

Interaction Energy=-0.91 kcal/mol

|   |             |             |             |
|---|-------------|-------------|-------------|
| C | -0.83847900 | 2.35013000  | 0.02851800  |
| C | -0.34049900 | 1.85619900  | -1.17373000 |
| C | -0.36604000 | 1.80553700  | 1.21913600  |
| C | 0.60568000  | 0.83642400  | -1.19128100 |
| C | 0.58001000  | 0.78550600  | 1.21369700  |
| C | 1.07666700  | 0.26273900  | 0.00476500  |
| H | -1.57101100 | 3.14444000  | 0.03751600  |
| H | -0.68139500 | 2.26928600  | -2.11375700 |
| H | -0.72710000 | 2.17862600  | 2.16831500  |
| H | 0.97043900  | 0.48783800  | -2.14475300 |
| H | 0.92450100  | 0.39671700  | 2.15912800  |
| N | 1.98359600  | -0.79335000 | -0.00791400 |
| C | 2.73791600  | -1.00051700 | -1.22747800 |
| C | 2.71181800  | -1.05228400 | 1.21760600  |
| H | 3.32698500  | -0.12186000 | -1.51924300 |
| H | 3.41323600  | -1.83894300 | -1.07972700 |
| H | 2.07444000  | -1.25633600 | -2.05099600 |
| H | 3.29413100  | -0.18702800 | 1.55879600  |
| H | 2.03103900  | -1.34242600 | 2.01521700  |
| H | 3.39051500  | -1.88401100 | 1.04894700  |
| O | -2.14797600 | -0.79624200 | -0.01566700 |
| C | -2.73415400 | -1.32680500 | -1.18572900 |

|   |             |             |             |
|---|-------------|-------------|-------------|
| H | -2.24266300 | -0.86129500 | -2.03577800 |
| H | -2.59698100 | -2.41227800 | -1.23772900 |
| H | -3.80678900 | -1.10809100 | -1.22302100 |
| C | -2.73893500 | -1.35744100 | 1.13757700  |
| H | -2.25097200 | -0.91453400 | 2.00162000  |
| H | -3.81172700 | -1.13972900 | 1.17620900  |
| H | -2.60191900 | -2.44391500 | 1.16150100  |

(CH3)2O-C6H5N(CH3)2 LP towards eclipsed N-LP away dimer MP2/aug-cc-pVDZ  
R=3.2 Angstroms

Interaction Energy=-0.89 kcal/mol

|   |             |             |             |
|---|-------------|-------------|-------------|
| C | -1.00359800 | 2.35496300  | 0.01091800  |
| C | -0.47797200 | 1.87365500  | 1.20649800  |
| C | -0.45238000 | 1.90848500  | -1.18664900 |
| C | 0.57922200  | 0.96931700  | 1.21070100  |
| C | 0.60494300  | 1.00432400  | -1.19456100 |
| C | 1.15939400  | 0.52548000  | 0.00742200  |
| H | -1.82682800 | 3.05489300  | 0.01230200  |
| H | -0.89501000 | 2.19476000  | 2.15173500  |
| H | -0.84921400 | 2.25708900  | -2.13084200 |
| H | 0.95176500  | 0.61601600  | 2.15941600  |
| H | 0.99779500  | 0.67866200  | -2.14497300 |
| N | 2.25123900  | -0.33816100 | 0.00652900  |
| C | 2.50085100  | -1.08721500 | 1.22138100  |
| C | 2.52700100  | -1.05162500 | -1.22399100 |
| H | 1.64961100  | -1.71211800 | 1.51980100  |
| H | 3.36428100  | -1.72772500 | 1.06301700  |
| H | 2.73797600  | -0.41646700 | 2.04460300  |
| H | 1.68253100  | -1.66731400 | -1.55860100 |
| H | 2.78146400  | -0.35728000 | -2.02208900 |
| H | 3.38704700  | -1.69674100 | -1.06590800 |
| O | -2.00700800 | -0.99751000 | -0.01101200 |
| C | -3.41168000 | -0.85248100 | -0.01450000 |
| H | -3.62890400 | 0.21224100  | -0.00917600 |
| H | -3.85253200 | -1.30770300 | -0.90791700 |
| H | -3.85798200 | -1.31770900 | 0.87102200  |
| C | -1.64589900 | -2.36268600 | -0.01758500 |
| H | -0.56036300 | -2.41216600 | -0.01453800 |
| H | -2.03449600 | -2.87726700 | 0.86783600  |
| H | -2.02904600 | -2.86726100 | -0.91110300 |

(CH3)2O-C6H5N(CH3)2 LP towards staggered N-LP away dimer MP2/aug-cc-pVDZ  
R=3.2 Angstroms

Interaction Energy=-1.05 kcal/mol

|   |             |            |             |
|---|-------------|------------|-------------|
| C | 0.77911800  | 2.43842100 | -0.01589700 |
| C | 0.30116000  | 1.90753300 | -1.21049500 |
| C | 0.27165400  | 1.94495200 | 1.18256800  |
| C | -0.66688700 | 0.90834200 | -1.21286700 |
| C | -0.69654200 | 0.94595000 | 1.19231100  |
| C | -1.20342700 | 0.41480800 | -0.00870000 |
| H | 1.53333100  | 3.21222200 | -0.01869700 |
| H | 0.68666800  | 2.26418100 | -2.15637500 |
| H | 0.63386700  | 2.33114200 | 2.12605200  |
| H | -1.00447500 | 0.51973600 | -2.16085900 |

|   |             |             |             |
|---|-------------|-------------|-------------|
| H | -1.05754500 | 0.58703800  | 2.14337800  |
| N | -2.20978000 | -0.54709200 | -0.00606700 |
| C | -2.38790300 | -1.31880000 | -1.21932500 |
| C | -2.41805200 | -1.28056400 | 1.22596100  |
| H | -1.48189000 | -1.86205000 | -1.51628900 |
| H | -3.18774400 | -2.03686100 | -1.05967800 |
| H | -2.68641200 | -0.67491600 | -2.04402600 |
| H | -1.51984400 | -1.81391700 | 1.56200500  |
| H | -2.73655100 | -0.61133000 | 2.02252300  |
| H | -3.21399200 | -2.00357300 | 1.06917200  |
| O | 2.09144600  | -0.80554600 | 0.01341400  |
| C | 2.66343000  | -1.35550700 | 1.18154300  |
| H | 2.18039300  | -0.88430100 | 2.03329800  |
| H | 2.50252100  | -2.43801300 | 1.22695700  |
| H | 3.74049500  | -1.16045500 | 1.22225300  |
| C | 2.67248600  | -1.37283700 | -1.14188700 |
| H | 2.19613100  | -0.91441700 | -2.00431700 |
| H | 3.74984700  | -1.17835100 | -1.17710600 |
| H | 2.51187400  | -2.45590900 | -1.17240200 |
