# Supplementary figures and images for: Ab initio study of substituent effects in the interactions of dimethyl ether with aromatic rings
Source: Royal Society of Chemistry journal article supplement (doi:10.1039/b718722j), 2008-01-01

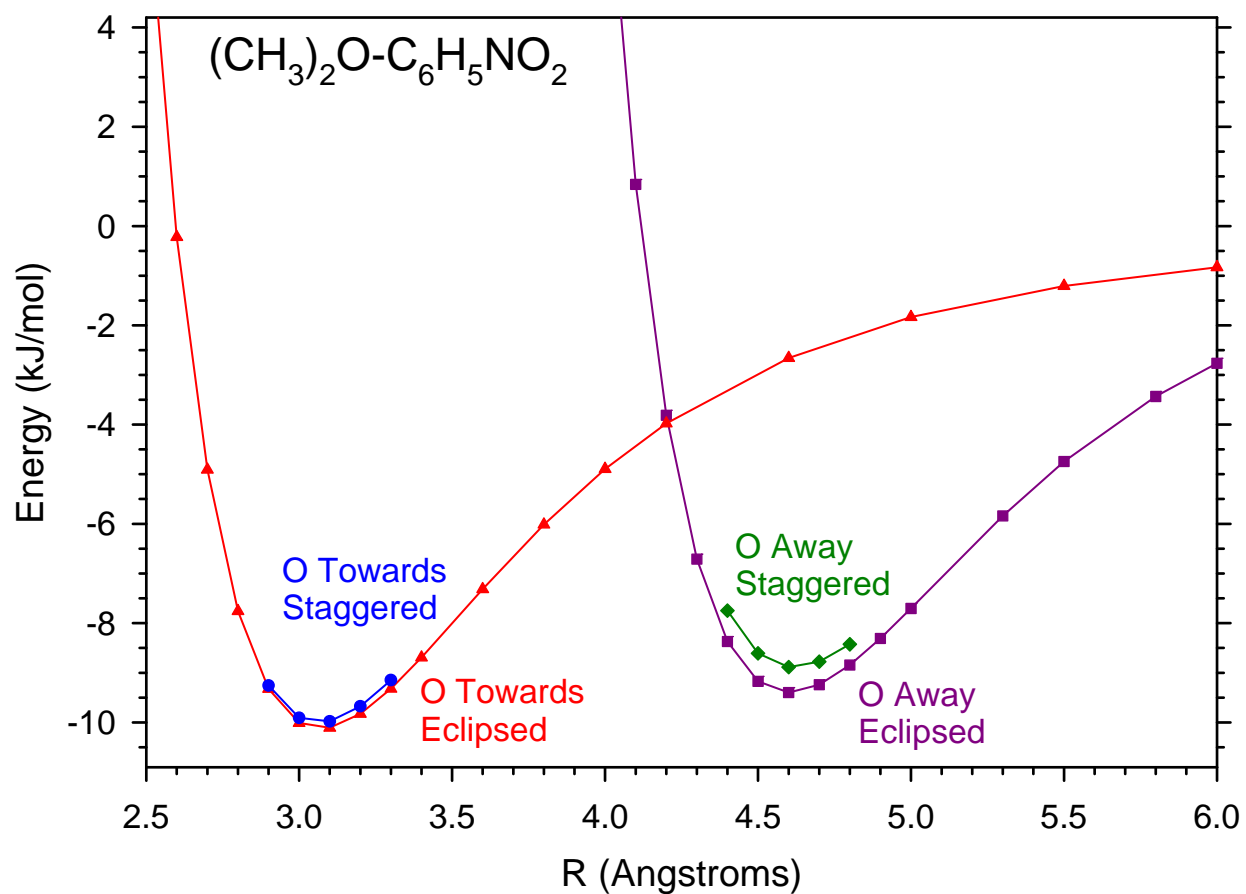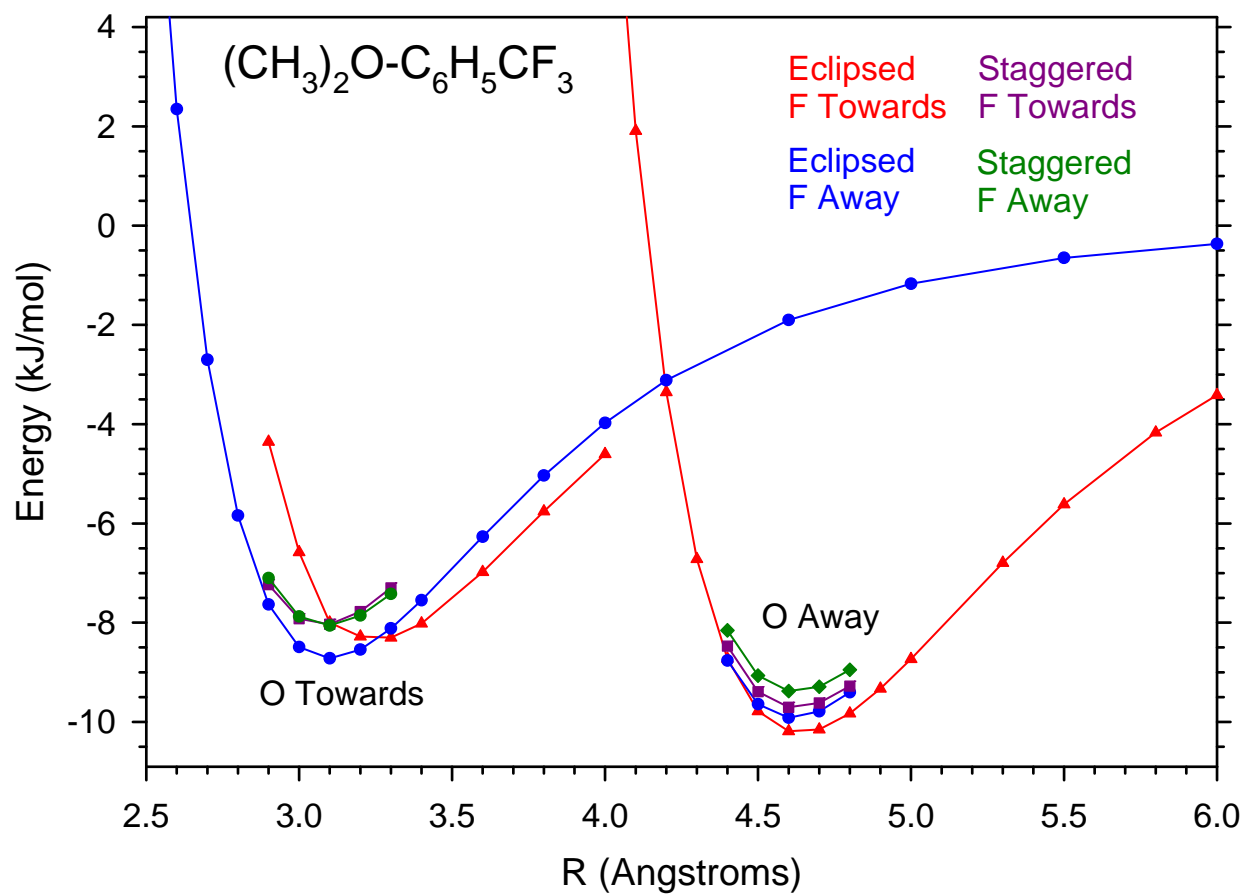

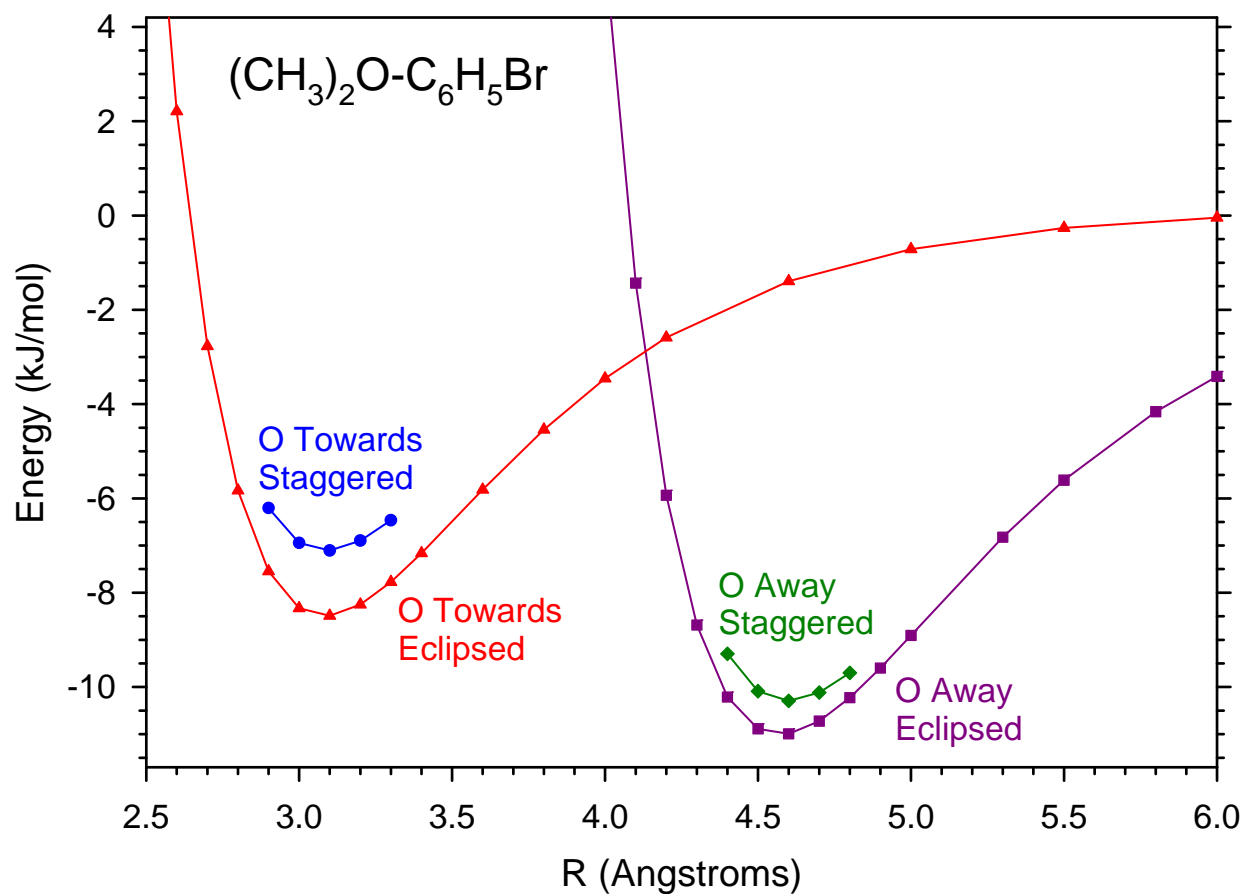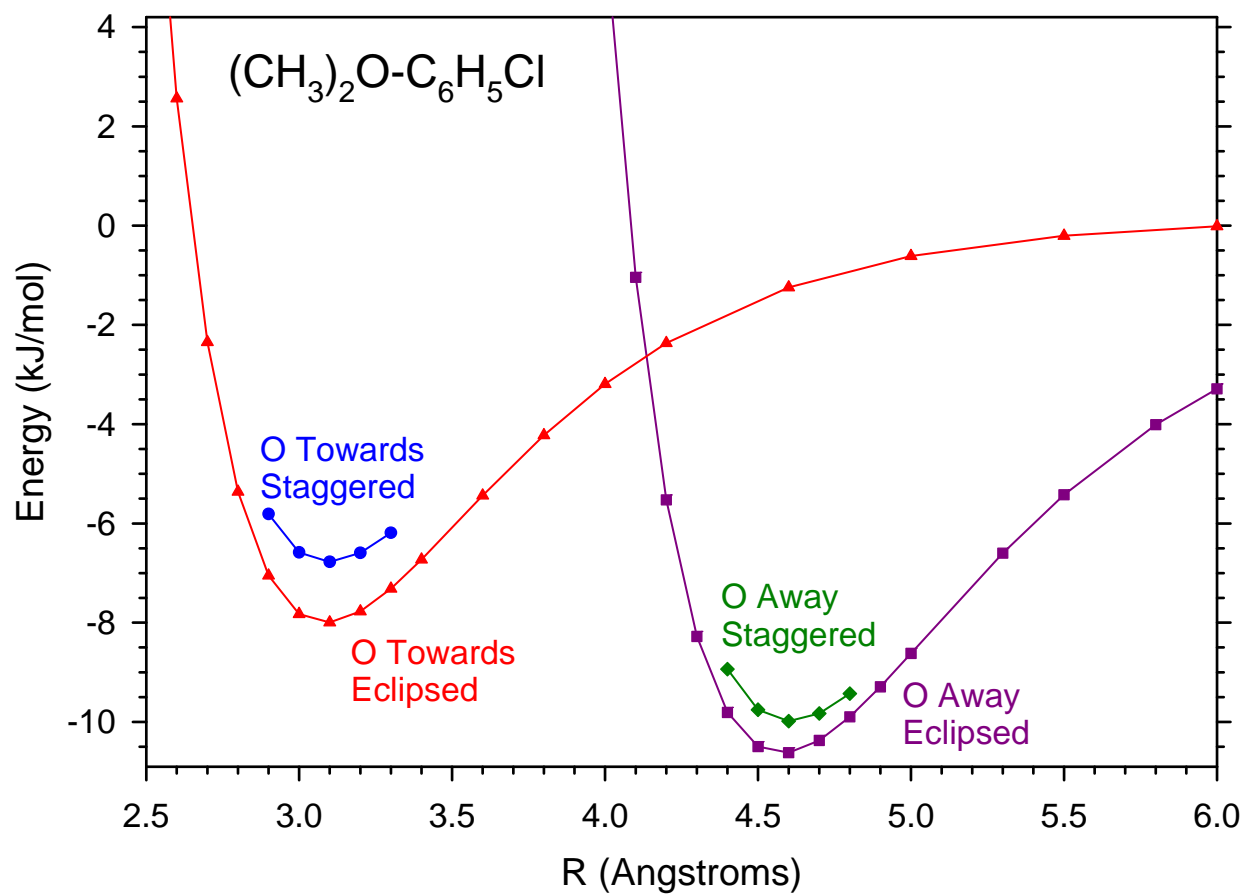

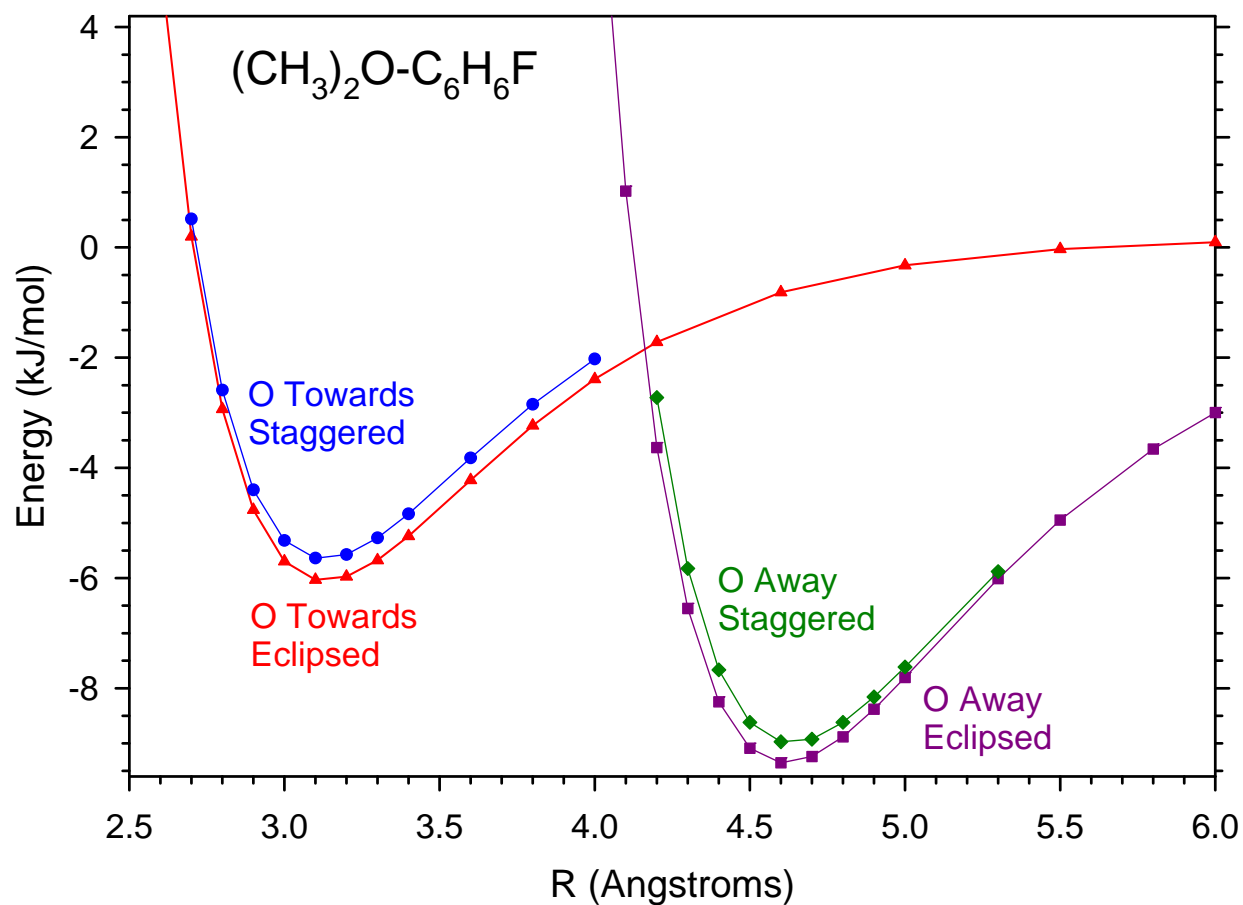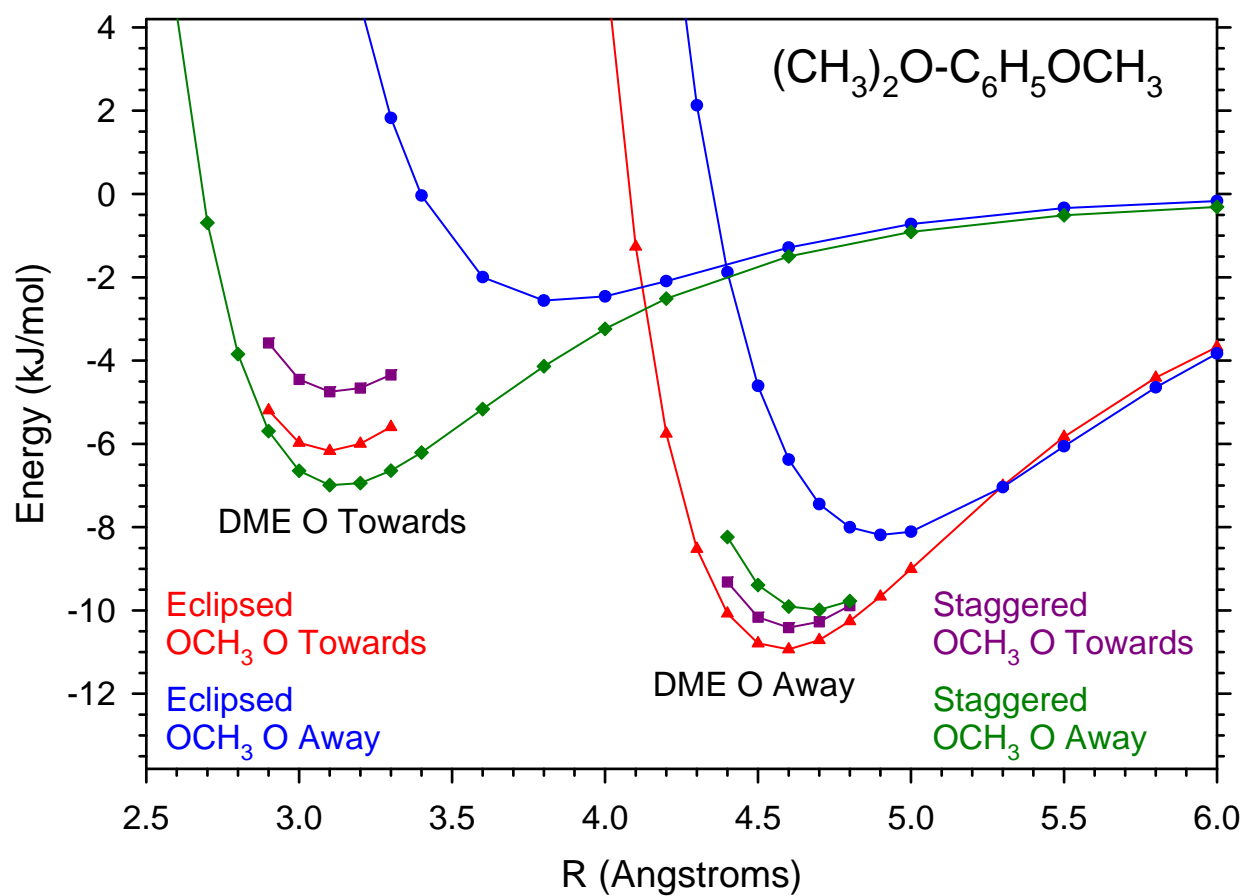

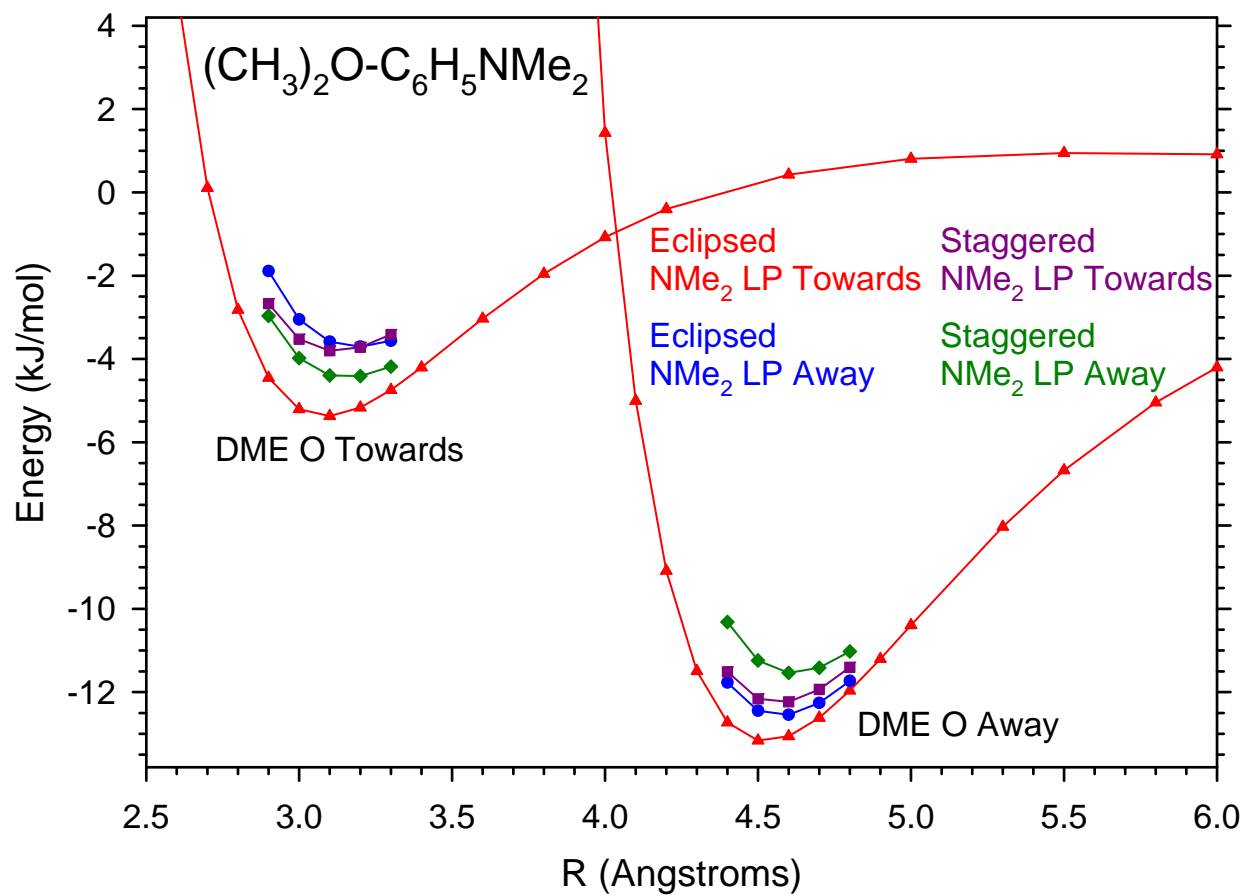

Supplement: b718722j_figures.pdf [file b718722j_figures.pdf]
